1  
2  
3  
4  
5  
6  
7  
8  
9  
10  
11  
12  
13  
14  
15  
16  
17  
18  
19  
20  
21  
22  
23

**Antarctic Teleosts With and Without Haemoglobin Behaviourally Mitigate  
Deleterious Effects of Acute Environmental Warming**

Iskander I. Ismailov<sup>1,\*</sup>, Jordan B. Scharping<sup>2,3</sup>, Iraida E. Andreeva<sup>1</sup>, Michael J. Friedlander<sup>1,\*</sup>

<sup>1</sup>Fralin Biomedical Research Institute at Virginia Tech Carilion, Roanoke, VA

<sup>2</sup>Virginia Tech Carilion School of Medicine, Roanoke, VA

<sup>3</sup>Current address: Northwestern Memorial Hospital, Chicago, IL

**\*Co-corresponding authors:**

Iskander I. Ismailov, Fralin Biomedical Research Institute at VTC, 2 Riverside Cir, Roanoke, VA 24016. e-mail: [ismailov@vtc.vt.edu](mailto:ismailov@vtc.vt.edu); Tel.: +1 (205) 746-5395.

Michael J. Friedlander, Fralin Biomedical Research Institute at VTC, 2 Riverside Cir, Roanoke, VA 24016. e-mail: [friedlan@vtc.vt.edu](mailto:friedlan@vtc.vt.edu); Tel: +1 (540) 526-2013

**Keywords:** Antarctic\_Notothenioids, behavioural thermoregulation, fanning, fixed action pattern, lateralization, respiratory behaviour, respiratory-locomotor coupling, startle-like behaviour

24 **ABSTRACT**

25 Recent studies forecast that many ectothermic animals, especially aquatic stenotherms, may  
26 not be able to thrive or even survive predicted climate change. These projections, however,  
27 generally do not call much attention to the role of behaviour, an essential thermoregulatory  
28 mechanism of many ectotherms. Here we characterize species-specific locomotor and  
29 respiratory responses to acute ambient warming in two highly stenothermic Antarctic  
30 Notothenioid fishes, one of which (*Chaenocephalus aceratus*) lacks haemoglobin and appears  
31 to be less tolerant to thermal stress as compared to the other (*Notothenia coriiceps*), which  
32 expresses haemoglobin. At the onset of ambient warming, both species perform distinct  
33 locomotor manoeuvres that appear to include avoidance reactions. In response to unavoidable  
34 progressive hyperthermia, fishes demonstrate a range of species-specific manoeuvres, all of  
35 which appear to provide some mitigation of the deleterious effects of obligatory  
36 thermoconformation and to compensate for increasing metabolic demand by enhancing the  
37 efficacy of branchial respiration. As temperature continues to rise, *Chaenocephalus aceratus*  
38 supplements these behaviours with intensive pectoral fin fanning which may facilitate cutaneous  
39 respiration through its scaleless integument, and *Notothenia coriiceps* manifests respiratory-  
40 locomotor coupling during repetitive startle-like manoeuvres which may further augment gill  
41 ventilation. The latter behaviours, found only in *Notothenia coriiceps*, have highly stereotyped  
42 appearance resembling Fixed Action Pattern sequences. Altogether, this behavioural flexibility  
43 could contribute to the reduction of the detrimental effects of acute thermal stress within a  
44 limited thermal range. In an ecologically relevant setting, this may enable efficient  
45 thermoregulation of fishes by habitat selection, thus facilitating their resilience in persistent  
46 environmental change.

47

48 **INTRODUCTION**

49 There is increasing concern about the fitness of life forms on Earth in the face of rising  
50 environmental temperatures (Thomas et al., 2004; Pacifici et al., 2015). As part of that  
51 awareness, the potential vulnerability of high latitude marine ecosystems, such as the Antarctic  
52 shelf, has drawn particular attention (Clarke et al., 2012; Constable et al., 2014), as they are  
53 likely facing some of the most rapid environmental changes on the planet (Vaughan et al., 2003;  
54 Cheng et al., 2019; see, however, Turner et al., 2016). Furthermore, isolated from the rest of the  
55 world by the Antarctic Circumpolar Current, inhabitants of this ecosystem have evolved under  
56 extremely cold conditions which remained thermally stable for millions of years (Barker and  
57 Thomas, 2004). In effect, they are thought to have specialized for such a milieu by developing  
58 stenothermy, *i.e.*, traded-off the ability to adjust to even small variations in temperature  
59 (Wohlschlag, 1964; Somero and DeVries, 1967).

60 Based on the results of experimental studies in a variety of aquatic organisms subjected to  
61 acute warming, one perspective on the physiological mechanisms that limit adaptive capacity  
62 and thermal tolerance of ectotherms is that cardiac collapse is ultimately responsible for  
63 organismal failure at extreme temperatures (see Eliason and Anttila, 2017 for a Review).  
64 Deriving rationale from the relationship between thermal tolerance of fishes to their aerobic  
65 metabolic rates (Fry and Hart, 1948), these studies provide the basis for an '*oxygen- and*  
66 *capacity-limited thermal tolerance*' theory (Pörtner, 2001) and attribute this collapse to a  
67 mismatch between the aerobic demand of the heart during thermally induced tachycardia and  
68 maximal ability to supply oxygen to the heart. Presented initially as an integrative concept  
69 comparing the effects of temperature on different organisms, this theory has lately generated  
70 discussion (Pörtner et al, 2017; Jutfelt et al., 2018) as a possible overreach attempting to merge  
71 environmentally meaningful thermal limits observed in natural habitats with acute sub-lethal

72 warming experiments at miniscule timescales having little ecological relevance. Furthermore,  
73 experimental studies in instrumented, often sedated or restrained animals, or in perfused *in vitro*  
74 and *in situ* preparations, generally do not encompass a critical thermoregulatory mechanism of  
75 ectotherms – behaviour (Crawshaw, 1979).

76 In this study, we examine behavioural responses elicited by ambient warming in two highly  
77 stenothermal Antarctic teleosts, *Notothenia coriiceps* (*N. coriiceps*, Richardson 1844) and  
78 *Chaenocephalus aceratus* (*C. aceratus*, Lönnberg 1906), swimming unrestricted in a tank.  
79 These fishes belong to the related families *Nototheniidae* and *Channichthyidae*, respectively,  
80 but differ in that the blood of *C. aceratus* (also called icefish) is devoid of the oxygen transport  
81 protein haemoglobin (Ruud, 1954; Cocca et al., 1995). Consequently, haemoglobinless (Hb-)  
82 icefishes supply tissues with oxygen dissolved directly in plasma, with an estimated oxygen-  
83 carrying capacity 90% lower than the blood of haemoglobin expressing (Hb+) Antarctic fishes  
84 (Holeton, 1970). Large volumes of plasma, big hearts and elaborate vasculature (Hemmingsen,  
85 1991) are thought to offset the Hb- state in icefishes, affording their successful habitation in the  
86 oxygen-rich Southern Ocean. Yet, compared to their Hb+ relatives, icefishes appear to be less  
87 tolerant to acute warming (Beers and Sidell, 2011), putatively due to inferior capacity to adjust  
88 cardiac performance at elevated temperatures (O'Brien et al., 2018; see, however, Joyce et al.,  
89 2018a). Hence, icefishes have been predicted to be particularly vulnerable to expected global  
90 climate change, unless behavioural thermoregulation and/or other physiological plasticity  
91 mechanisms alleviate (Huey, et al., 2012) the effects of this detriment.

92 Otherwise, while being considered extremely stenothermal, negatively buoyant bottom dwellers  
93 *N. coriiceps* and *C. aceratus* are both in fact eurybathic (Eastman, 2017). That is, occasionally  
94 found at depths as far down as 500 and 700 metres, respectively, both fishes prefer bathymetric  
95 ranges closer to the surface. Namely, *N. coriiceps* are most commonly found at depths less than

96 100 m, while *C. aceratus* are typically observed at depths between 100 and 300 m (Hureau,  
97 1985), conceivably both performing frequent routine migrations in the water column. In all  
98 locations inhabited by both fishes from as far North as South Georgia and Bouvetøya islands  
99 (both at ~54°S) to the Antarctic Peninsula (~65.5°S) (Hureau, 1985), on the other hand, these  
100 depths correspond to a prominent thermo- and oxycline (most significant between 50 and 300  
101 m, Fig. S1), encompassing a range of temperatures from -1.8°C to +2°C and a dissolved  
102 oxygen (DO<sub>2</sub>) gradient from ~10 mg·L<sup>-1</sup> to ~6 mg·L<sup>-1</sup>. Then, the fishes must possess certain  
103 adaptive capacities that allow them to function equally well in such diverse environments.  
104 Behavioural strategies of the Hb+ and Hb- animals responding to ambient warming, however,  
105 may be different. Testing this possibility constituted the main goal of this study.

106 We report that both Hb+ and Hb- Antarctic fishes respond to acute ambient warming with an  
107 extensive repertoire of behaviours. Restricted in the ability to perform essential  
108 thermoregulatory behaviour such as habitat selection in the uniformly heated tank, fishes  
109 respond to progressive hyperthermia with an elaborate range of manoeuvres - relative  
110 quiescence, startle-like behaviours, aquatic surface respiration, pectoral fin fanning and pectoral  
111 fin splay, accompanied with continuous changes in ventilation. While manifestations of these  
112 behaviours are species-specific in terms of intensity, duration, thermal dependence and  
113 stereotypy, most of them are observed in both fishes. To compensate for increasing respiratory  
114 demand at the temperatures above +8°C, both fishes enhance the efficacy of their respiratory  
115 pumps. In addition, sedentary Hb- fish supplement increased ventilatory effort with intense  
116 fanning which may facilitate cutaneous respiration, whereas more agile Hb+ fish augment it with  
117 respiratory-locomotor coupling during repetitive startle-like manoeuvres. Altogether, these  
118 behavioural responses appear to constitute complementary adaptive actions to physiologically

- 119 mitigate deleterious effects of obligatory thermoconformation, resulting in concerted optimization  
120 of multiple vital functions within a limited thermal range.

121 **MATERIALS AND METHODS**

122 **Animals**

123 Animals were collected during the austral fall of 2015 (April-June) off the Southwestern shore of  
124 Low Island (63°30'S, 62°42'W) and of Brabant Island in Dallmann Bay near Astrolabe Needle  
125 (64°08'S, 62°40'W). Otter trawls were used to capture both *C. aceratus* and *N. coriiceps*, and  
126 baited benthic traps - for *N. coriiceps* only, all deployed from the Antarctic Research and Supply  
127 Vessel *Laurence M. Gould* (LMG). On board of the LMG, captured animals were held  
128 segregated by the species up to 4 days in insulated 900 litre tanks (Xactics™, ON, Canada)  
129 supplied with running ambient ocean water and superfluous aeration at a rate of 17 litres per  
130 minute provided by two submersed glass-bonded silica air diffusers (Sweetwater® model AS5L,  
131 Pentair Aquatic Eco-Systems, FL, USA) and two diaphragm air pumps (24 litres per minute at 1  
132 psi output, Sweetwater® model SL24, Pentair Aquatic Eco-Systems, FL, USA) per tank. After  
133 transfer to aquaria at the United States Antarctic Program research station, Palmer Station,  
134 fishes were kept segregated by the species in 9,000 litre tanks flowing fresh sand-filtered ocean  
135 water pumped from the Arthur Harbour at ambient temperature (-1.7°C to +1°C) for a minimum  
136 period of 72 h and up to 3 weeks prior to experiments. *N. coriiceps* were fed fish muscle blocks  
137 once every 2-3 days. Icefish do not feed in captivity (O'Brien et al., 2018), so these animals  
138 were used within two weeks of capture. All animal procedures were approved by the University  
139 of Alaska, Fairbanks Institutional Animal Care Committee (570217-9).

140

141 **Temperature ramp experiments**

142 Behavioural experiments were performed in a custom-built 500-litre (93 cm (W) x 93 cm (L) x 74  
143 cm (H)) flow-through experimental acrylic tank placed in a climate controlled room (with air

144 temperature maintained between +2 °C and +4°C) and filled with 300 litres of seawater. All  
145 surfaces of the tank were additionally covered with 3.175 mm thick transparent red (#2423)  
146 acrylic (Professional Plastics, Inc., CA, USA). The rationale for the latter was based on the  
147 finding that Notothenioids lack long-wave sensitive opsin gene (Pointer et al., 2005). Therefore,  
148 used photic conditions mimic light environment corresponding to the austral mid-winter  
149 darkness in the natural habitat of the fishes, visually shield them from the experimenters, and  
150 should help to minimize stress.

151 Before the experiment, each specimen was allowed to acclimate overnight in the experimental  
152 tank continuously flowing with fresh ocean water (at a rate of 11-15 litres per minute) pumped  
153 from the Arthur Harbour at ambient temperature. This ensured relative consistency of thermal  
154 environment of fishes from capture to the beginning of the experiment. Baseline behaviours  
155 were recorded during this period (for at least 60 minutes just prior to warming ramp). Warming  
156 rate of ~3.2°C per hour was achieved by re-circulating tank water through the coil of a custom-  
157 made glass heat exchanger with a jacket plumbed to a heating bath-pump (AD28R-30, VWR,  
158 PA, USA) running in an external closed loop mode. During the temperature ramp, before  
159 entering the heat exchanger, re-circulated water was aerated at a rate of 17 litres per minute  
160 using two submersed glass-bonded silica air diffusers (Sweetwater® model AS5L, Pentair  
161 Aquatic Eco-Systems, FL, USA) and a diaphragm air pump (24 litres per minute at 1 psi output,  
162 Sweetwater® model SL24, Pentair Aquatic Eco-Systems, FL, USA).

163 Digital video images were acquired with Ethovision XT10 tracking software (Noldus Information  
164 Technologies, Inc., Netherlands) at a standard frame rate of 30 Hz using a Basler acA 1300-  
165 60gm area scan GigE camera (Basler AG, Germany) equipped with a Computar H2Z0414C-MP  
166 CCTV lens (CBC Group, NC, USA). The tank contained no gravel or any other substrate, and  
167 imaging was performed in a transparency mode (ventral view), in a 34" x34" acrylic mirror



168 (Professional Plastics, Inc., CA, USA) placed at a shallow angle (to minimize distortions) 75 cm  
169 below the tank. Illumination was achieved with four 12"x12" heat- and flicker-free (200W HMI  
170 light output) LED flood light panels (model 1x1LS Litepanels, Vitec Group, UK) positioned 50 cm  
171 above the tank and waterproofed by lamination from both sides 36% transmission value  
172 diffusion filter (# 216, LEE Filters, UK) placed directly over the tank. Water temperature and DO<sub>2</sub>  
173 were recorded synchronously using an Orion Versa Star meter and DO<sub>2</sub> probe (Thermo  
174 Scientific, MA, USA). Warming and video recordings continued until loss of equilibrium (LOE)  
175 was observed. All experiments were terminal, and each animal was used in a single behavioural  
176 experiment without repetition.

177

### 178 ***Analyses of locomotor activity***

179 Locomotion was analysed *post hoc* in video recordings acquired in the field using an automated  
180 tracking algorithm of EthoVision XT software. Instantaneous velocities (expressed in body  
181 lengths per second, BL·s<sup>-1</sup>) were calculated by the program from instantaneous (*i.e.*, measured  
182 between every two consecutive frames taken 33 ms apart) displacement of the centre of the  
183 mass of the fish (determined using a proprietary algorithm of the EthoVision software). The  
184 average body lengths were 36.91 ± 1.26 cm and 47.36 ± 3.22 cm, for five *N. coriiceps* and five  
185 *C. aceratus*, respectively (mean ± SEM). Elongation ratios of fishes used in our experiments  
186 were determined as the ratio of length over width (Ward and Azizi, 2004), and constituted 8.38 ±  
187 0.24 (mean ± SEM; n = 5) for *C. aceratus* and 4.73 ± 0.11 (mean ± SEM; n = 5) for *N. coriiceps*.

188

### 189 ***Analyses of respiratory behaviours***

190 Opercular movements were analysed *post hoc* by manual frame-by-frame measurements of fish  
191 head width in Adobe Premiere Pro v.5.5.2 (Adobe Inc., CA, USA) projecting field video  
192 recordings on the screen of a Dell U2410 monitor (1920 x 1200 resolution) at 3.2x  
193 magnification. All metrics were determined unremitted throughout entire experiment, except the  
194 moments when high linear or angular velocity of fish movement precluded reliable  
195 measurements. Ventilation frequencies were determined by tallying of opercular movement  
196 cycles per minute, and compared for consistency with records of counts taken at 10-15 minute  
197 time intervals during actual field experiments at Palmer Station. Opercula opening amplitude  
198 (OA), a direct proxy metric of ventilatory stroke volume, was measured as the difference in width  
199 of fish head with opercula maximally open and maximally closed, using an Apollo VCG7070  
200 transparency film (Acco Brands, IL, USA) with a 1 mm grid. Accuracy of head width change  
201 measurements was arbitrarily set at 0.5 mm. Opercula opening time (OT), an inverse proxy  
202 metric of branchial pump suction, was calculated from the number of frames taken during  
203 transition of opercula from closed to maximally open state. Opercula opening velocity (OV)  
204 calculated as  $OV = OA/OT$ . This ratio is considered as “unidimensional” proxy metric of  
205 branchial pump velocity to characterize the efficacy of ventilation. Due to suboptimal contrast in  
206 some recordings, reliable characterization of respiration metrics was possible only in three  
207 specimens of each species. Numbers and durations of surfacing events were manually tallied  
208 *post hoc* on the frame-by-frame basis in Adobe Premiere Pro.

209

### 210 ***Kinematics of startle-like behaviours***

211 Spontaneous startle-like behaviours were analysed *post hoc* manually in Adobe Premiere Pro,  
212 on a frame-by-frame basis, using conventions comparable to those described above for  
213 analyses of respiratory behaviours and Apollo VCG7070 transparency film (without a grid)

214 placed directly on a Dell U2410 monitor projecting field video recordings. Angular velocities  
215 were determined by measuring with a transparent protractor angles between vectors drawn  
216 from the centre of mass (vertex of the angle, determined using a proprietary algorithm of the  
217 EthoVision software) of the fishes to the snout at appropriate temporal resolution. For fast S-  
218 bend startle-like manoeuvres of *N. coriiceps*, a 33 ms<sup>-1</sup> frame rate may result in underestimation  
219 of angular velocity.

220 Analyses of axial movements during thermally induced startle-like responses were done using  
221 manual sketches of the body shapes of the fishes made on transparency film on a frame-by-  
222 frame basis. For presentation purposes, ventral outlines of the turning fish were made over  
223 scanned and imported into CorelDraw (Corel Corporation, ON, Canada) images.

224

### 225 ***Lateralization of C-bend manoeuvres in response to ambient warming***

226 For laterality analyses, quantities and directions of C-bend manoeuvres were tallied for every  
227 0.5°C increment of the temperature ramp in each of five experiments with Hb+ and Hb- fishes.  
228 Since tank walls can affect lateralization (Eaton and Emberly, 1991), turns that occurred near  
229 the walls were not tallied. Relative Lateralization indices (LR, %, Bisazza et al., 1998) were  
230 calculated using following equation:

$$LR = \frac{(\text{Number of Turns to the Right} - \text{Number of Turns to the Left})}{(\text{Number of Turns to the Right} + \text{Number of Turns to the Left})} \times 100$$

231 We note, however, that unlike in detour paradigm of Bisazza et al. analysing single instance of  
232 behaviour of each fish in multiple experimental trials, we analysed multiple manoeuvres of each  
233 specimen in a single continuous warming experiment within the range of temperatures in which  
234 the fish demonstrated spontaneous, repetitive startle-like behaviours. Mean LR ( $\pm$  SEM) was  
235 used to assess turning preference (i.e. bias in left or right turns) for 5 specimens of each

236 species. The LR index at the level of individuals allowed to classify specimens between the  
237 extreme values of “100” (when fish turned right in all cases recorded within temperature interval  
238 corresponding to 5%  $T_{LOE}$ ) and “-100” (when fish turned left on all cases recorded within  
239 temperature interval corresponding to 5%  $T_{LOE}$ ). A mean LR near zero indicates that a given  
240 species is neither left nor right biased in its tendency to turn in a given temperature range.

241

### 242 ***Analyses of fin movements***

243 Duration of fanning bouts, fanning frequency (as a number of pectoral fin beats per second  
244 within a bout) and duration of pectoral fin splay were manually tallied *post hoc* on the frame-by-  
245 frame basis in Adobe Premiere Pro.

246

### 247 ***Quantification, presentation of grouped data, and statistical analyses***

248 For analyses and presentation of grouped data for various behaviours as a function of  
249 temperature, data obtained in individual experiments within the species were aligned against  
250 normalized range of the ramp (%  $T_{LOE}$ , bottom axes in Figures 3 through 6, with 0 and 100%  
251 corresponding to initial temperature and  $T_{LOE}$ , respectively, in a given experiment). Such  
252 treatment of the data was necessary to account for the differences in initial temperatures and in  
253 the LOE onset temperatures between experiments. Absolute ranges of temperature ramps in °C  
254 (top axes in Figures) are depicted as red plots above the traces, with red triangle symbols and  
255 horizontal error bars representing mean and SEM of the temperatures at the start of the ramp  
256 and at LOE averaged between respective numbers of experiments with each species.

257 Statistical significance of laterality bias was estimated by comparing lateralization indices at  
258 each 5% LOE temperature interval to a theoretical zero (random choice, 0% laterality) using one

259 sample *t*-tests (Bisazza et al., 2000). Two-sample unequal variance two-tailed *t*-tests were used  
260 to determine statistical significance of changes in ventilation rate.

261

262 **RESULTS**

263 **Locomotor responses to warming have alternating patterns**

264 Fig. 1 depicts representative locomotor behaviours of *C. aceratus* and *N. coriiceps* elicited by

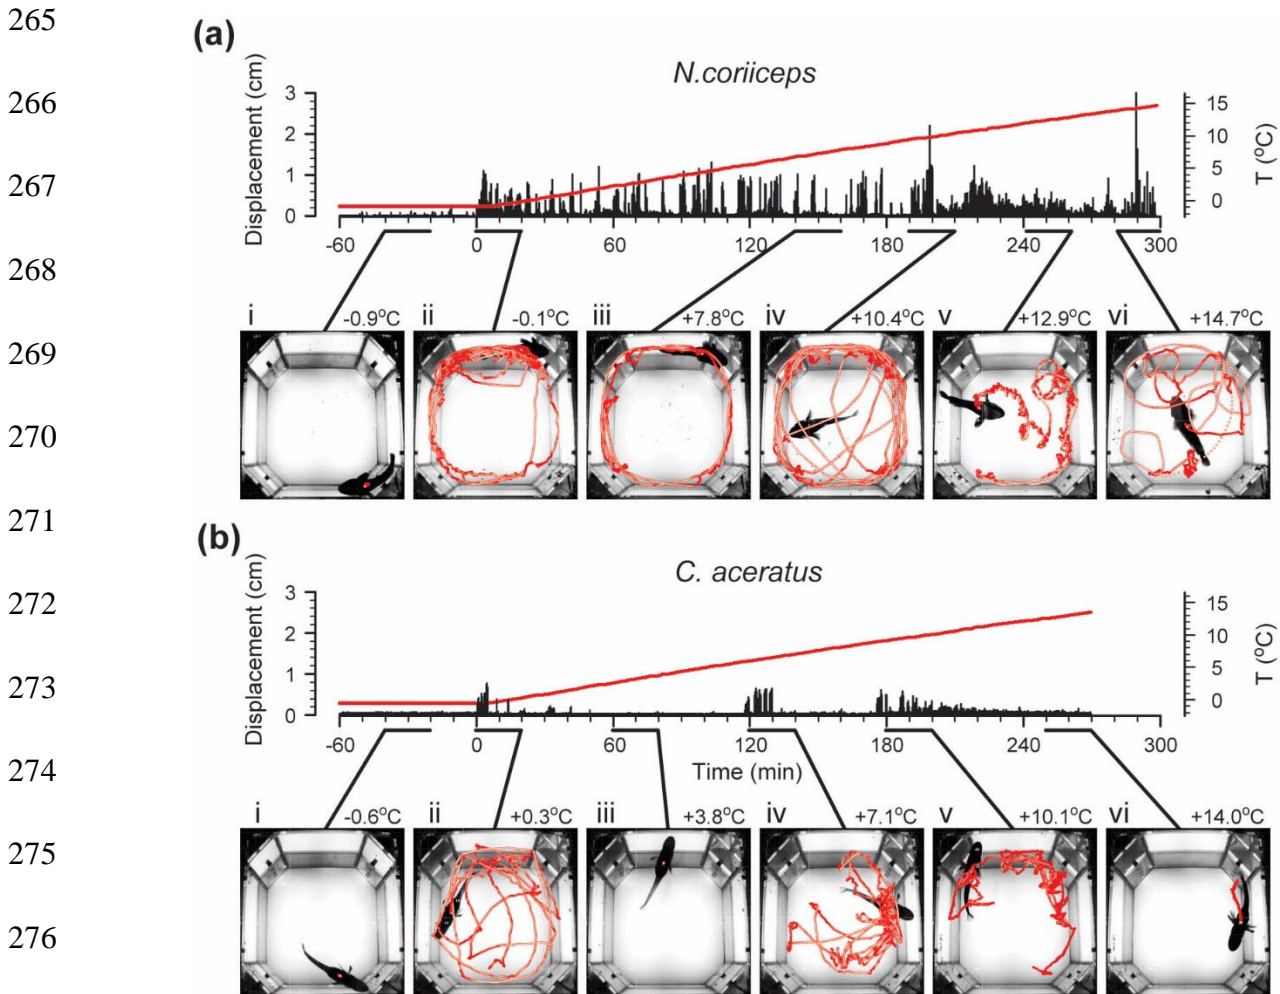

**Figure 1. Representative locomotor responses of fishes to warming.**

(a) and (b) represent time plots of absolute instantaneous displacement (left axes) of a single specimen of *N. coriiceps* and of a single specimen of *C. aceratus*, respectively. Time “0” corresponds to the beginning of the temperature ramp; negative values correspond to the final sixty minutes of an overnight acclimation in the experimental tank. Red lines represent absolute temperature (right axes) of water, with the maximum corresponding to the LOE. Insets below time plots depict locomotion trajectories for 20 minute time periods at select temperatures (maximal temperatures during these episodes are shown next to the insets). (i) Baseline station-holding. (ii) Early responses to initial rise in temperature. (iii) First period of reduced motility. (iv) Intense locomotion and startle-like behaviours. (v) Second period of reduced motility with multiple startle-like behaviours. (vi) Onset of LOE.

277 acute warming, with marked transient bouts of increased locomotion of both species,  
278 interspersed with periods of reduced motility. Individual motility varies substantially within each  
279 species before and during warming, with Hb+ fish displaying more agility at all times. However,  
280 the alternating pattern of thermally induced changes in locomotion persists in all individuals with  
281 some species-specific trends in the onset, duration and velocity (Fig. S1).

282 The first locomotor responses to warming occur in all animals of both species with temperature  
283 elevations as little as 0.1°C, in agreement with early estimates of thermal sensitivity of fishes  
284 (Shelford and Powers, 1915; Bull, 1936). In striking contrast to sustained sedentary baseline  
285 behaviour (Figs. 1a (i) and 1b (i)), these manoeuvres manifest as yawing along the walls of the  
286 tank (Figs. 1a (ii) and 1b (ii)). Instantaneous velocities up to 0.8 body lengths per second ( $\text{BL}\cdot\text{s}^{-1}$ ,  
287 see Materials and Methods for numerical BL data) in Hb+ and up to 0.4  $\text{BL}\cdot\text{s}^{-1}$  in Hb- fish are  
288 achieved predominately in the labriform swimming mode, with fore-aft rowing strokes of  
289 pectorals providing the thrust. Tail and trunk muscles are recruited only for occasional  
290 surfacings and short bouts of subcarangiform swimming, mostly evident in Hb+ fish.

291 Unable to perform thermoregulation by habitat selection in the tank, fishes respond to continued  
292 increase in temperature by reduction of motility (Figs. 1a (iii) and 1b (iii)). Although variable at  
293 the individual level, reduction of motility has marked commonalities within each species.

294 Namely, as the temperature rises 1-1.5°C above initial, Hb- fish assume essentially motionless  
295 station-holding and maintain it for tens of minutes. In contrast to that, Hb+ fish generally  
296 continue to yaw along the tank walls, but gradually decrease the duration of swimming bouts. By  
297 +6°C, locomotion of Hb+ fish subsides, with station-holding episodes lasting up to ten minutes,  
298 interleaved occasionally with brief bouts of labriform swimming at velocities not exceeding 0.8  
299  $\text{BL}\cdot\text{s}^{-1}$ .

300

301 ***Continued warming triggers startle-like responses***

302 Conspicuous episodes of increased locomotion also occur between +5°C and +10°C in Hb- *C.*  
303 *aceratus*, and between +8.5°C and +12°C in Hb+ *N. coriiceps*, and manifest as intense  
304 swimming along the walls, accompanied by multiple surfacing events, particularly in Hb+ fish.  
305 Fishes use mainly the labriform swimming mode, achieving linear velocities up to ~1 BL·s<sup>-1</sup> in  
306 Hb+ and ~0.6 BL·s<sup>-1</sup> in Hb- animals (Fig.S1). In addition, characteristic only for *N. coriiceps*, they  
307 demonstrate several fast crossings of the tank, through its middle (Figs. 1a (iv) and 1b (iv)),  
308 using the subcarangiform propulsion with velocities reaching 2-3 BL·s<sup>-1</sup> (Fig. S1a).

309 Notably, most of these manoeuvres involve distinctive patterns of body bending and subsequent  
310 turning. Namely, high-velocity swimming laps of Hb+ fish begin with a rotation of the head  
311 coincident with a typical contralateral tail bending, thus forming an S-shape (Figs. 2a and S3a).  
312 These highly dynamic S-bends are followed by very fast turns with angular velocities ( $V_a$ ) of  
313 ~1,000 degrees per second (deg·s<sup>-1</sup>). These manoeuvres, however, are scarce, with no more  
314 than five of them occurring in each animal. Turns of another type, recurrent in both species,  
315 begin with rotation of the head followed by ipsilateral bending of the tail, thus forming a C-shape  
316 (Figs. 2b, 2c, S3b and S3c). Such C-bend turns of *N. coriiceps* occur in a single stage, reaching  
317 maximal  $V_a$  of ~250 deg·s<sup>-1</sup> (Fig. 2b). In contrast, multiple peaks of  $V_a$  below 100 deg·s<sup>-1</sup> are  
318 evident during C-bend turns of *C. aceratus* (Fig. 2c). In both species, these manoeuvres are  
319 followed by either a short labriform swimming bout, or an unpowered glide of variable duration.



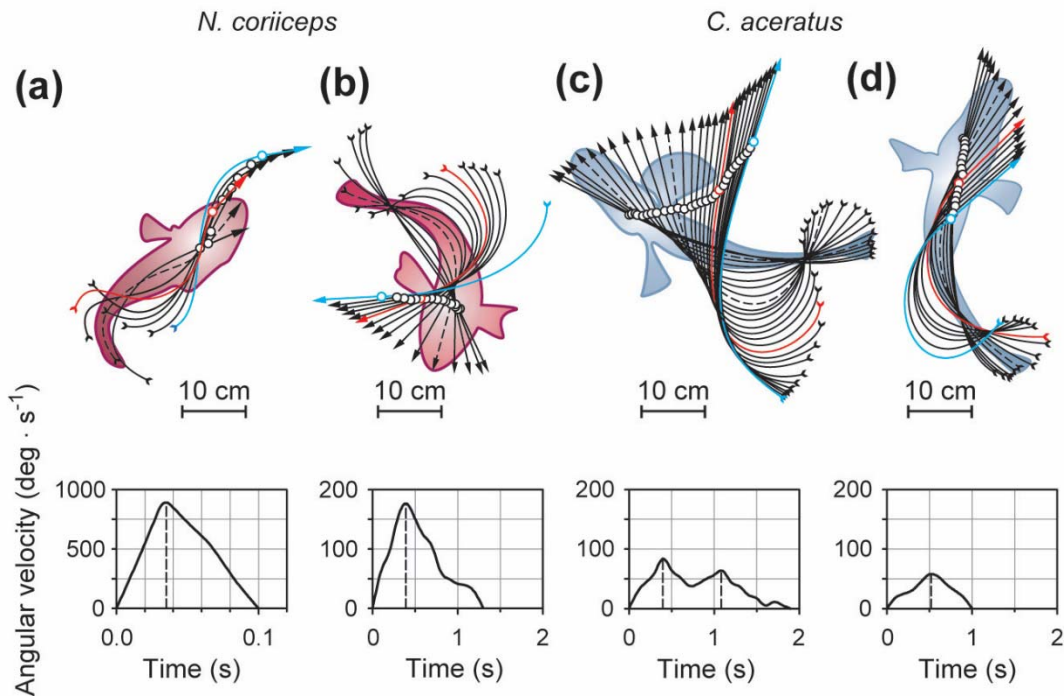

**Figure 2. Repertoire of thermally induced startle-like manoeuvres.**

(a) Fast S-bend turn of *N. coriiceps* (33 ms intervals) at +11.1°C. (b) Intermediate velocity single-stage C-bend turn of *N. coriiceps* (100 ms intervals) at +12.4°C. (c) Slow multi-stage C-bend turn of *C. aceratus* (100 ms intervals) at +8.5°C. (d) Withdrawal-like manoeuvre of *C. aceratus* (100 ms intervals) at +11.5°C. Curved arrows and circles represent midlines and centres of mass of the fishes, respectively. Silhouettes with dashed midlines represent body-shapes and positions of fishes at maximal angular velocities during the turn stage of the manoeuvres (dashed vertical lines in the time plots of angular velocity). Red midlines indicate completion of the first stage of the manoeuvre (namely, the S- or C-bend proper) and transition to the second stage, swimming or gliding without change in direction (shown as blue midlines).

320 While these features are reminiscent of S- and C-starts in escape and startle behaviours  
321 reported in other fishes in response to external stimuli (Webb, 1976, Eaton et al., 1977;  
322 Domenici, 2010), 30 frames·s<sup>-1</sup> sampling rate is suboptimal and may limit sufficient temporal  
323 resolution of body shapes. However, the midline and the silhouette of the fish in Fig. 2a have a  
324 discernible S-shape appearance at 33 ms, *i.e.*, at maximal angular velocity resolved during the  
325 turn stage. In addition, translation of the centre of the mass of *N. coriiceps* during manoeuvres  
326 depicted in Figs. 2a and 2b are consistent with early definitions of S-starts being characterised  
327 by displacement in line with the original body axis, and C-starts featuring large angles of turn

328 (Webb, 1976; Webb, 1978; Eaton et al., 1977). Nonetheless, since the fish are not startled by  
329 an obvious stimulus, we term these thermally-induced manoeuvres “startle-like”, albeit  
330 differentiating initial S- and C-bends.

331 Unique to Hb- species, another type of thermally induced reactive behaviour features only slight  
332 rotation of the head with  $V_a$  below  $50 \text{ deg}\cdot\text{s}^{-1}$ , followed by retraction of the body (Figs. 2d and  
333 S3d). Observed in all five specimens of *C. aceratus*, it has the appearance of a slow backward  
334 movement of variable duration, and resembles “withdrawal” or “head retraction”, a startle  
335 response described in some other sedentary bottom-dwelling fishes with elongated bodies  
336 (Meyers et al, 1998; Ward and Azizi, 2004; Liu and Hale, 2014). While *C. aceratus* are indeed  
337 characterized by relatively high elongation ratios (see Materials and Methods for quantification  
338 and numerical data) and bottom-dwelling lifestyle, these thermally induced manoeuvres are  
339 much slower (~1 second in duration, Fig. 2d) than canonical withdrawals (which are over in 100-  
340 200 ms, Meyers et al, 1998; Ward and Azizi, 2004; Biermann et al 2004). Therefore, we term  
341 this behaviour “withdrawal-like”.

342 The repertoire and incidence of these startle-like behaviours of Hb+ and Hb- fishes demonstrate  
343 marked differences in thermal dependence (Fig. 3). While exact temperatures of the onset of S-  
344 bend manoeuvres of *N. coriiceps* vary between individual specimens, in each animal they occur  
345 within a relatively narrow interval of thermal change of  $\sim 1.5^\circ\text{C}$  anywhere between  $+9.5$  and  
346  $+12^\circ\text{C}$ . The intense swimming subsides after that in all Hb+ fish, followed by another period of  
347 reduced locomotion. However, they begin performing spontaneous C-bend manoeuvres,  
348 progressively increasing in incidence, and reaching up to 10 turns per minute between  $+12^\circ\text{C}$   
349 and  $+14^\circ\text{C}$  (Figs. 3b and 1a(v)).

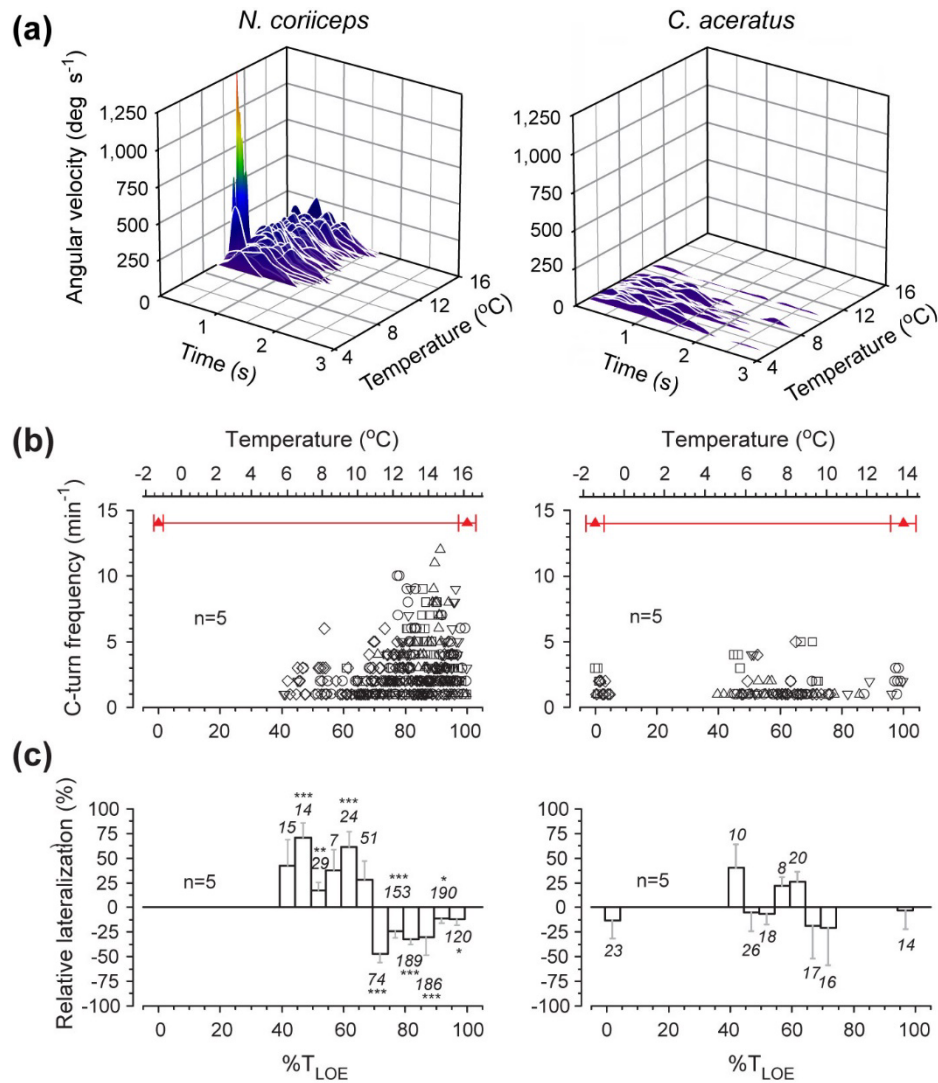

**Figure 3. Startle-like behaviours as a function of temperature.**

(a) Time plots of angular velocity ( $V_a$ ) during startle-like manoeuvres at respective temperatures in a single specimen of Hb+ and Hb- species. Rainbow colour code denotes the continuum of angular velocities from low (violet) to high (red) during fast S-bend turns ( $V_a > 500 \text{ deg}\cdot\text{s}^{-1}$ , 9 events) and intermediate velocity single-stage C-bend turns in *N. coriiceps* ( $V_a < 250 \text{ deg}\cdot\text{s}^{-1}$ , 137 events), and during slow multi-stage C-bend turns ( $V_a < 100 \text{ deg}\cdot\text{s}^{-1}$ , 25 events) in *C. aceratus*. (b) Data points represent number of C-bend turns during each consecutive time interval one minute in duration in five specimens (depicted as different symbols) of each species. (c) Relative lateralization (mean and SEM) of C-bend turns in 5% of  $T_{LOE}$  increments averaged between five specimens of each species. For conventions of quantification and presentation of grouped data as a function of temperature, see Materials and Methods. Numerals next to bars indicate numbers of events within each temperature increment in five animals. Asterisks denote statistical significance of laterality bias ( $p < 0.05$  - \*;  $p < 0.005$  - \*\*;  $p < 0.001$  - \*\*\*) at each temperature interval compared to a random choice (0% laterality) using one sample *t*-tests.

351 C-bend turns of *C. aceratus*, in contrast, are sporadic, and their frequency does not appear to  
352 change with temperature (Figs. 3b and 1b (v)). In this species, scarce withdrawal-like  
353 manoeuvres constitute substantial portion of motoric behaviours between +9°C and +12°C,  
354 occasionally interrupting extended episodes of station-holding. Nonetheless, startle-like  
355 behaviours persist in both fishes until the onset of LOE, when a short bout of erratic locomotion  
356 and surfacing occurs in all Hb+ and some Hb- animals (Figs. 1a (vi) and 1b (vi)).

357 Notably, below +11°C, startle-like C-bend turns of all *N. coriiceps* display a marked rightward  
358 preference (Fig. 3c, left graph). Above this temperature, this bias reverses, and the newly  
359 established leftward preference persists in subsequent C-bend turns of all five Hb+ fish.

360 With further warming, however, this lateralization gradually decreases and eventually  
361 disappears, when turns become scarce near the  $T_{LOE}$ . Both the initial and reversed biases of  
362 turns of *N. coriiceps* are statistically significant (for *p*-values for each 5% LOE interval, see Fig.  
363 3c, left graph), except when the behaviour just starts to manifest at 40% LOE, and at the point  
364 of right-left shift near 65% LOE. In contrast, none of five Hb- fish examined demonstrate any  
365 apparent bias of thermally induced C-bend manoeuvres (Fig. 3c, right graph).

366

### 367 ***Coping with thermal stress involves ventilatory adjustments***

368 In response to progressive aquatic hypoxia (Fig. S4) that is accompanied by escalating  
369 metabolic load associated with rising temperatures, fishes adjust their ventilation, as quantified  
370 in *post hoc* analyses of opercular movements in video recordings. Metrics of ventilation in three  
371 specimens of each species are shown in Fig. S5. At all temperatures, absolute ventilation rates  
372 of *N. coriiceps* are nearly two-fold higher than those of *C. aceratus* (Fig. S5a). However,  
373 because of high variability in locomotor activity (particularly between Hb+ specimens, Fig. S2)

374 this difference in absolute ventilation rates between the Hb+ and Hb- species is not statistically  
375 significant ( $p > 0.8$ ; two-sample two-tailed unequal variance  $t$ -test) except at their maxima ( $p <$   
376  $0.02$ , two-sample two-tailed unequal variance  $t$ -test). Nonetheless, there are obvious similarities  
377 in the overall dynamics of changes in ventilation both within and between the species. Namely,  
378 after a small transient rise in ventilation frequency ( $f_V$ ) at the onset of warming ramp, once the  
379 temperature rises more than  $2^\circ\text{C}$  above initial, a steady increase in  $f_V$  becomes evident in all  
380 animals (Figs. 4a and S5a). This hyperventilation persists even during episodes of relative  
381 quiescence, which suggests that it is not a consequence of locomotor effort. In both species,  $f_V$   
382 reach their maxima between  $+8$  and  $+8.5^\circ\text{C}$ , rising  $2.5 \pm 0.9$  times in *N. coriiceps* and  $2.61 \pm 0.19$   
383 times in *C. aceratus* (normalized to the initial for each specimen; the increase is not statistically  
384 different between the species). In addition, near the maximum of  $f_V$ , both fishes exhibit another  
385 well-known type of respiratory behaviour, aquatic surface respiration (Fig. S6). Ventilatory  
386 responses to further warming diverge between Hb+ and Hb- fishes, but there is substantial  
387 correlation of the overall changes in  $f_V$  within the species, stronger in *C. aceratus* ( $r$  ranging from  
388  $0.88$  to  $0.96$ ) than in *N. coriiceps* ( $r$  ranging from  $0.40$  to  $0.71$ ). Namely, after reaching the  
389 maximum, *C. aceratus* continue to hyperventilate until the  $1$ – $1.5^\circ\text{C}$  prior to LOE, whereas  $f_V$  of  
390 *N. coriiceps* declines precipitously within a rather narrow interval of temperature rise ( $\sim 2^\circ\text{C}$ ) to a  
391 plateau at a lower, yet still relatively elevated, level.

392 Two other measures of opercular movements are the opening amplitude (OA) and the opening  
393 time (OT). With rising temperatures, OA increases progressively in both species, persistent till  
394 LOE (Fig. 4b). Hb- fish, however, recruit this adjustment at the onset of hyperventilation,  
395 whereas Hb+ fish employ it when  $f_V$  approaches its peak. Thermally induced changes of OT,  
396 however, are biphasic, and nearly mirror the inverse of changes in  $f_V$  in both species (Fig. 4c),

397

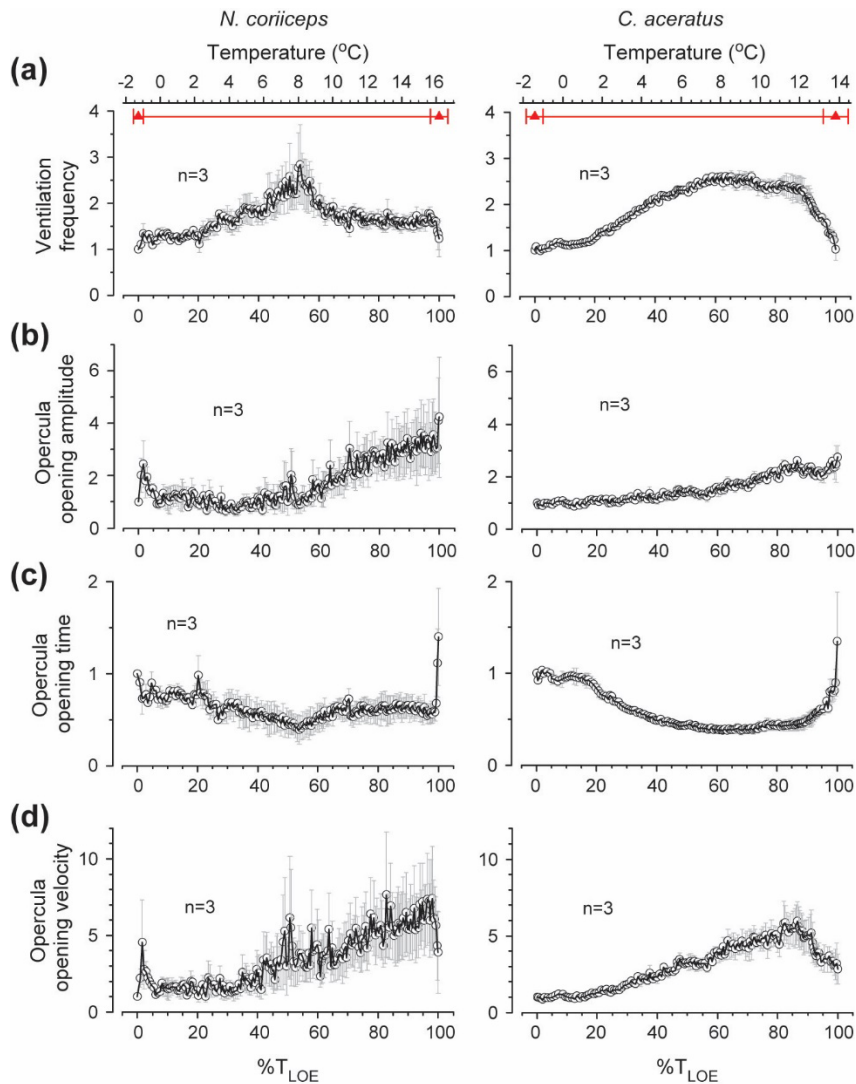

**Figure 4. Thermally induced ventilatory responses.**

(a) Ventilation frequencies ( $f_v$ ). (b) Opercula opening amplitudes (OA). (c) Opercula opening times (time for opercula to transition from closed to open state, OT). (d) Opercula opening velocity (OV, calculated as  $OV = OA/OT$ ). Data points and error bars in all plots represent means and SEM of each metric normalized to the initial value for each animal, and averaged for three specimens of each species. For conventions of quantification and presentation of grouped data as a function of temperature, see Materials and Methods.

398

399



400 plateaus, in both species, OT remains essentially unchanged, whereas OA steadily rises.  
401 reaching their minima nearly coincident with the maximal  $f_V$  between +8 and +8.5°C. With  
402 further warming, *C. aceratus* maintain fast opercular openings (short OT) until the last 1–1.5°C  
403 prior to LOE, whereas in *N. coriiceps* they become slower (longer OT). Furthermore, during  $f_V$   
404 This translates into continued growth of the ratio of these two measures of opercular  
405 movements, *i.e.*, opercula opening velocity (OV) (Fig. 4d), which keeps increasing while  $f_V$   
406 remains constant. When approaching LOE, at the temperatures above +15.5°C in *N. coriiceps*,  
407 and +11.5°C in *C. aceratus*, both  $f_V$  and OV decline in both species followed by respiratory  
408 collapse.

409

#### 410 ***Continuous acute thermal stress triggers fanning and fin splay***

411 Two other distinctive behaviours manifest in both species at the temperatures above +8°C. Both  
412 of them involve movements of pectoral fins with marked thermal dependences and species-  
413 specific differences in appearance.

414 One behaviour manifests as a cyclical fin movement in nearly stationary fishes, with no obvious  
415 relevance to locomotion, comparable to those reported in a variety of fishes during egg-guarding  
416 (Hancock, 1852) and termed “fanning”. In Hb- fish, it consists of anteroposterior undulations of  
417 large and flexible fan-shaped appendages, extended from the trunk (Fig. 5a, top panel,  
418 Supplemental Movies 1 and 2). These undulations have a mean frequency of ~1Hz (Fig. 5b),  
419 and occur in bouts lasting from tens to hundreds of seconds (Fig. 5c). Movements of less  
420 flexible pectorals of Hb+ fish present as co-mingled “sway” and “sweep” motions (Fig. 5a,  
421 bottom panel, Supplemental Movie 3). They are more than twice as slow as undulations in *C.*  
422 *aceratus* (Fig. 5b), and occur in short bouts (Fig. 5c).

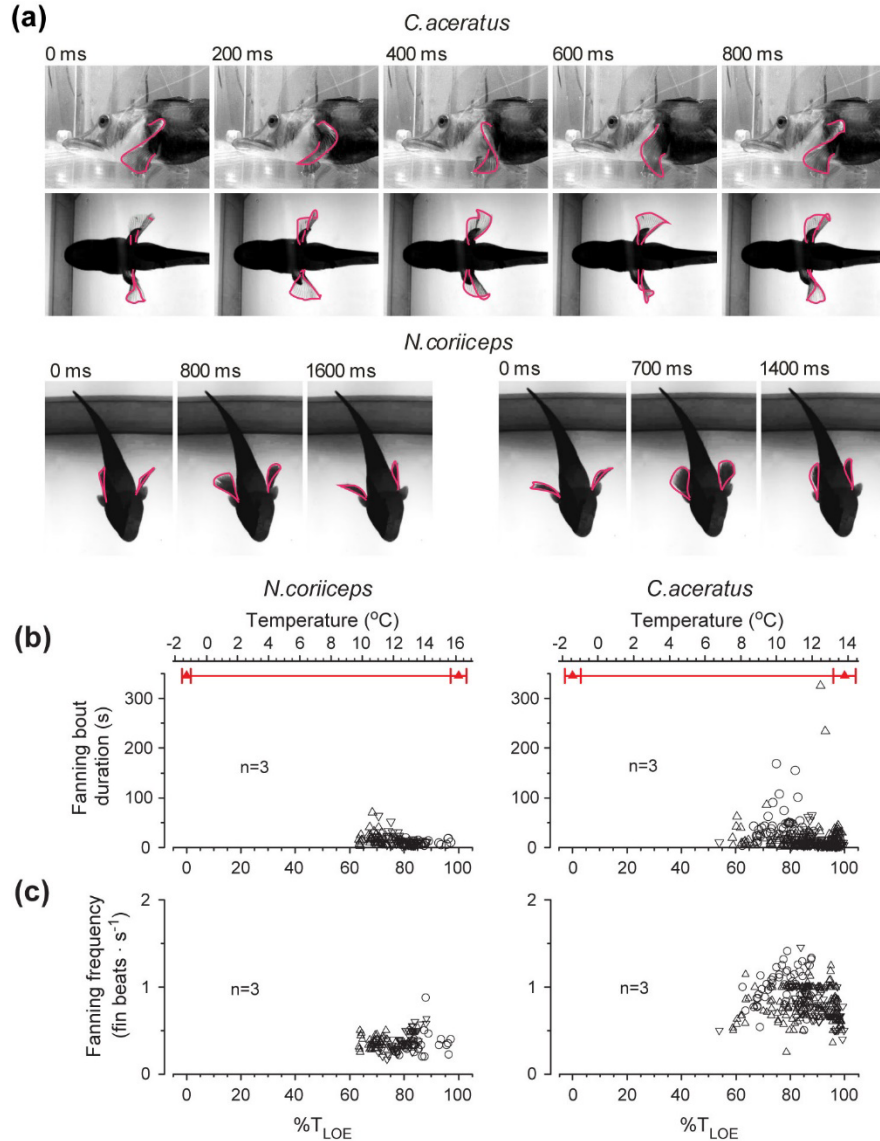

**Figure 5. Acute warming elicits pectoral fin fanning.**

(a) Top panel depicts lateral (upper images) and ventral (lower images) view of one complete cycle (800 milliseconds in duration, every 6th frame shown) of undulatory fanning, typical for *C. aceratus*. Bottom panel depicts ventral view of one cycle of “sway” (fins adducted and abducted in a counterphase) fanning 1.6 s in duration (left set of images, every 24th frame is shown) and one cycle of “sweep” (fins adducted and abducted in a synphase) fanning 1.4 seconds in duration (right set of images, every 21st frame is shown), characteristic for *N. coriiceps*. (b) Temperature plots of duration of fanning bouts (episodes of uninterrupted continuous fanning at near constant frequency). (c) Temperature plots of fanning frequency (number of fin beats per second within a bout). For conventions of quantification and presentation of grouped data as a function of temperature, see Materials and Methods. Different symbols in (b) and (c) represent three specimens of each species.



424 In another behaviour, fishes spread their pectoral fins laterally, nearly perpendicular to the trunk,  
425 and maintain this position for a period of time (Fig. 6a). To the best of our knowledge, no  
426 comparable manoeuvre has ever been reported before, and we term it “splay” to depict the

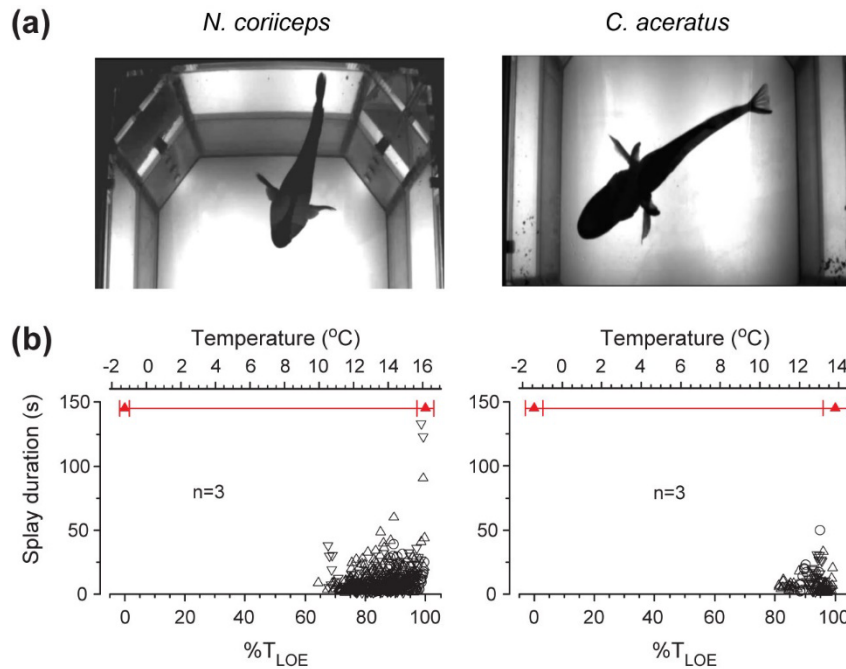

**Figure 6. Fin splay behaviours at elevated temperatures.**

(a) Representative still images of splays in Hb+ and Hb- fishes. (b) Temperature plots of fin splay episode duration. Different symbols represent three specimens of each species. For conventions of quantification and presentation of grouped data as a function of temperature, see Materials and Methods.

427 spreading of appendages.

428 Numerous splays of *N. coriiceps* are evident within relatively wide thermal range between  
429 +10°C and +16°C, increasing ~10 fold in occurrence by +13°C and up to 5-fold in duration by  
430 +16°C (Fig. 6b, left panel). Sporadic splays of *C. aceratus*, on the other hand, manifest between  
431 +9°C and +13°C, increasing ~4 fold in occurrence and up to 3-fold in duration (Fig. 6b, right  
432 panel).

433

434

435 ***Patterned respiratory-locomotor coupling of N. coriiceps***

436 Numerous fanning and splays of *N. coriiceps* are interspersed with C-bend turns, with certain  
437 stereotypy in the sequence of manoeuvres (Supplemental Movie 4), thus having features of  
438 “Fixed Action Pattern” (FAP) behaviour (Tinbergen, 1951). Namely, this behaviour manifests as  
439 copious repetitive Splay-Turn-Glide triplet sequences as often as five-six (up to ten near +14°C)  
440 times per minute (Fig 3B). The sequence of the three components remains invariant with  
441 increasing temperature, whereas the frequency of triplet occurrence, as well as duration of  
442 individual components appear to vary.

443 In addition, this patterned behaviour includes coordination between the movements of the  
444 opercula and rotation of the head. Namely, the acceleration and deceleration stages of head  
445 rotation during the C-bend turns are synchronized with the adduction and abduction phases of  
446 ventilatory opercular movements, respectively (Fig. 7).

447 That is, C-bend turns routinely commence with opercula partially open, though undergoing  
448 adduction and closing near the peak of angular velocity. Opercula start opening again during  
449 angular deceleration and continue to open after the turn is complete, achieving the maximally  
450 open state when the fish is gliding. Such synchronization is evident in most C-bend turns at  
451 temperatures between +9°C and +15°C (Figs. 7a - 7f), except within 1°C prior to LOE, when the  
452 synchrony is lost (Fig. 7g). Characteristically, these triplet manoeuvres synchronized with  
453 ventilatory movements of opercula involve only C-bend turns with  $V_a$  of  $\sim 250 \text{ deg}\cdot\text{s}^{-1}$ , whereas  
454  $V_a$  of S-bend turns ( $\sim 1000 \text{ deg}\cdot\text{s}^{-1}$ ) is too fast to be coupled with opercula movements and gill  
455 ventilation.

456

457

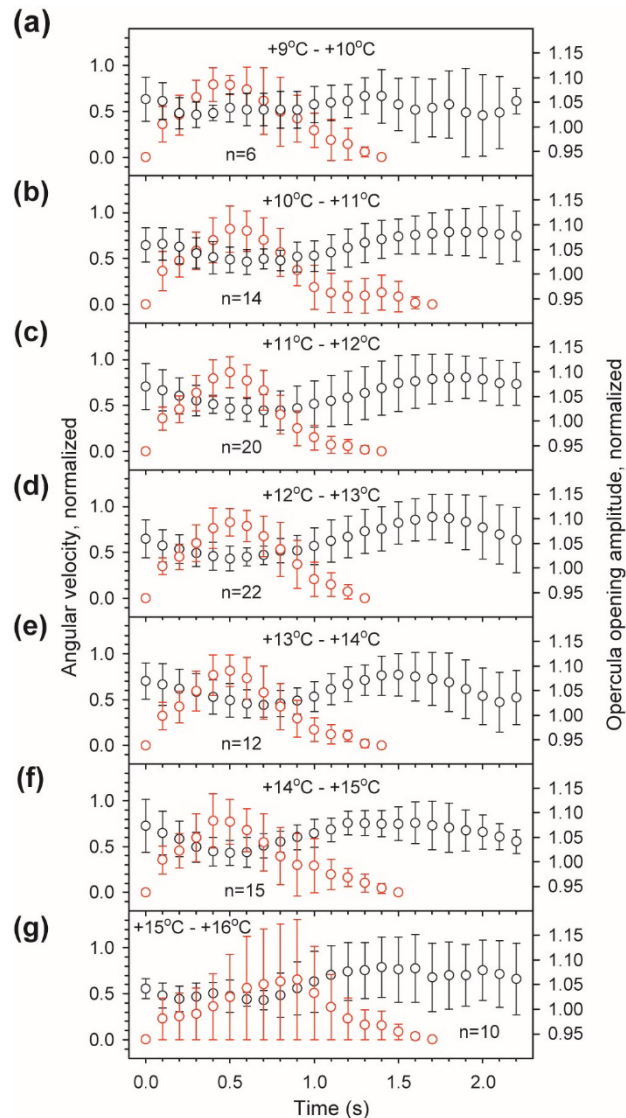

458

459

**Figure 7. Respiratory-locomotor coupling in *N. coriiceps* during thermally induced C-bend manoeuvres.**

Data points and error bars represent mean and SD of angular velocity (red symbols) and opercula opening amplitude (black symbols), during C-bend turns of a single specimen of *N. coriiceps* (Cor #4 in Figs. S2 and S4 depicting locomotor and respiratory responses), normalized to their maximum and minimum values, respectively, and averaged for all successive turns within each 1°C interval of temperature change (see numbers in the graphs).

460 **DISCUSSION**

461 Major findings of our study are two-fold: 1) Antarctic Notothenoid fishes respond to acute  
462 ambient warming with an extensive repertoire of manoeuvres, most of which are observed in  
463 both Hb+ and Hb- species; 2) with some common tactics, behavioural strategies of Hb+ and Hb-  
464 fishes differ in terms of intensity, duration, thermal dependence and stereotypy of manoeuvres  
465 recruited. These commonalities and differences are discussed below in relation to possible  
466 physiological and ecological correlates.

467 Locomotion has been long recognized as the most obvious, and probably most universal,  
468 behavioural response of fishes to environmental stressors, particularly temperature (Shelford  
469 and Powers, 1915; Friedlander et al., 1976). From the rich repertoire of behaviours elicited in  
470 Hb- and Hb+ Antarctic fishes by acute warming, the earliest locomotor manoeuvres in response  
471 to the initial temperature rise may represent the attempts at ecologically relevant avoidance  
472 reactions. Also called habitat selection, this behavioural response has been considered the  
473 most essential thermoregulatory mechanism of ectotherms in a heterogeneous thermal  
474 environment (Crawshaw, 1979). However, essential for meaningful interpretation of the results  
475 of this study in the context of thermal tolerance and vulnerability to climate change, we must  
476 emphasize that our acute experiments in the laboratory setting differ from ecologically relevant  
477 venues in several aspects. First, although allowed a certain degree of freedom to express  
478 various behaviours, the fishes in the experimental tank are prevented from performing  
479 thermoregulation by habitat selection and are forced to thermoconform. Second, warming  
480 continues during this obligatory thermoconformation, further exacerbating the environmental  
481 stress. Third, the rate of temperature increase ( $\sim 3^{\circ}\text{C}$  per hour) is at least  $10^5$  times faster than  
482 any current estimate of the rate of the Southern Ocean warming due to climate change ( $\sim 3^{\circ}\text{C}$   
483 per 100 years, Vaughan et al., 2003; Cheng et al., 2019; Turner et al., 2016). Taking into

484 account these aspects, we infer that most of the manoeuvres of the fishes observed in our  
485 experiments are aimed to physiologically mitigate detrimental effects of unavoidable acute  
486 warming.

487 We reason that reduced motility following initial presumed avoidance reaction may represent a  
488 strategy for conserving energy and preventing metabolic stress, similar to transitory “quiescent  
489 behaviour” observed in other fishes coping with progressive aquatic hypoxia (Nilsson et al.,  
490 1993; Schurmann and Steffensen, 1994). More prominent manifestation of this behaviour in Hb-  
491 fishes may suggest that lower oxygen-carrying capacity of their blood makes them more  
492 “prudent”.

493 With regard to startle behaviours, they are generally considered in a relatively narrow context of  
494 predator-prey interactions (Webb, 1976) or in relation to direct external stimuli (Eaton et al.  
495 1977). Hence, environmental factors, such as temperature or DO<sub>2</sub>, are usually viewed in terms  
496 of their adverse effects on the success in avoiding predation (Domenici et al., 2007; Grigaltchik  
497 et al., 2012; Sánchez-García et al., 2019). Thermally induced startle-like manoeuvres in  
498 Antarctic fishes reported here for the first time suggest that similar behavioural patterns may be  
499 recruited not only in predator-prey interactions, but also in responses to environmental stress.  
500 Noteworthy in this regard, elevated temperature was reported to trigger escape-like turns in the  
501 African clawed frog tadpoles (Sillar and Robertson, 2009). Nonetheless, since the fish in our  
502 experiments are not startled by an obvious stimulus, and their movements during these  
503 responses are relatively slow, we reason that these thermally-induced manoeuvres are unlikely  
504 to represent *bona fide* startle behaviours (for recent definitions, see Domenici and Hale, 2019).

505 It is indeed possible that startle-like behaviours may result from the direct effects of elevated  
506 temperature on peripheral and/or central components of underlying neural circuits, activation of  
507 sensorimotor code and/or related motor pattern generating systems. Notably, all Notothenioids

508 examined to date appear to lack (Eastman and Lannoo, 2004) the well identifiable T-shaped  
509 giant reticulospinal neurons in the hindbrain, the Mauthner cells, thought to initiate escape  
510 responses in most fishes (Zottoli and Faber, 2000; Eaton et al., 2001). Absence of obvious  
511 Mauthner cells, or presence of cells with deviant anatomy, has been reported in some fishes  
512 (Zottoli and Faber, 2000; Eaton et al., 2001), and their escapes were slower and significantly  
513 delayed (Greenwood et al., 2010). Our experiments do not provide any information about the  
514 latency of thermally induced startle-like manoeuvres since they appear to be spontaneous  
515 rather than evoked by an obvious external stimulus other than temperature. Notably, absolute  
516 values of maximal linear velocity ( $0.7 - 1.4 \text{ m}\cdot\text{s}^{-1}$ ) attained by *N. coriiceps* during thermally  
517 induced S-bend startle-like manoeuvres at  $+10 - +12^\circ\text{C}$  are comparable with those during C-  
518 start escapes elicited by visual or tactile stimuli at  $0^\circ\text{C}$  in *N. neglecta* ( $1.28 \text{ m}\cdot\text{s}^{-1}$ , Archer and  
519 Johnston, 1989) and in *N. coriiceps* ( $0.71 \text{ m}\cdot\text{s}^{-1}$ , Franklin & Johnston, 1997). Thus, within a  
520 limited range of acutely elevated temperatures, Hb+ Antarctic fishes appear to be capable of  
521 maintaining high motor performance. No data on kinematics of startle behaviours of Hb- icefish  
522 is available for comparison.

523 The significance of lateralization of startle-like behaviours in *N. coriiceps* and its reversal is not  
524 immediately apparent. Preferred direction away from the startling stimulus has been seen in  
525 other fishes (Domenici, 2010). Lateralisation of barrier detours in consequent T-maze trials, on  
526 the other hand, appears to be poorly reproducible (Roche et al., 2020). Neither phenomenon,  
527 however, appears to have a relation to lateralization of spontaneous thermally induced turns of  
528 *N. coriiceps* observed in our experiments. Otherwise, aquatic hypoxia as well as elevated  
529 temperature have been demonstrated to alter both the direction and magnitude of behavioural  
530 laterality (Lucon-Xiccato et al., 2014; Allan et al., 2015), considered mainly in the context of  
531 predator-prey relationships. While exact mechanisms leading to these alterations are yet to be

532 established, behavioural laterality is thought to reflect asymmetrical functional specialization of  
533 the brain across vertebrate species (Vallortigara & Rogers, 2005), with a rightward bias being  
534 controlled by the left hemisphere which is thought to govern routine behaviours, and a leftward  
535 bias controlled by the right hemisphere presumably responsible for emergency and stress  
536 reactions (Rogers, 2010).

537 Our findings of ventilatory adjustments while coping with progressive aquatic hypoxia and  
538 escalating metabolic load associated with rising temperatures are consistent with earlier  
539 observations in acutely warmed temperate (e.g., Hughes and Roberts, 1970; Heath and  
540 Hughes, 1973) and some Hb+ Antarctic fishes (Fanta et al., 1989; Jayasundara et al., 2013).  
541 Furthermore, Jayasundara et al. (2013) report a bell-shaped thermal dependence of ventilation  
542 rate in another Hb+ Antarctic Notothenioid, *Trematomus bernacchii*, with a maximum near +8°C,  
543 comparable to our observations in *N. coriiceps*. Fast and substantial fall in  $f_V$  observed after the  
544 ventilation maximum in Hb+ *N. coriiceps* (but not in Hb- *C. aceratus*) may result, at least in part,  
545 from autonomic splenic contraction which can rapidly boost the blood oxygen carrying capacity,  
546 similar to that seen following acute step-wise transfer of *Trematomus bernacchii* to +10°C  
547 (Davison et al., 1994). Noteworthy at this juncture, increased haematocrit has been reported in  
548 acutely warmed *N. coriiceps* at  $T_{LOE}$  (Beers and Sidell, 2011; Joyce et al, 2018b), although  
549 neither thermal dependence nor detailed physiology of the phenomenon are known. Otherwise,  
550 continued increase of ventilatory stroke volume (as deduced from measurements of OA, as a  
551 proxy metric) while maintaining nearly constant branchial pump suction (as deemed from  
552 measurements of OT, as an inverse proxy metric), evident in both Hb+ and Hb- species,  
553 suggests that during acute heat stress fishes employ additional, possibly more energetically  
554 advantageous, adjustments of ventilation by enhancing its efficacy (evident from changes in OV,  
555 as a proxy metric) without increasing  $f_V$ . In addition, *N. coriiceps* may use synchronization of



556 respiratory movements of opercula with head rotation during numerous C-bend turns to facilitate  
557 irrigation of the gills and thus increase respiratory efficiency via respiratory-locomotor coupling,  
558 comparable to that shown during undulatory swimming of a trout (Akanyeti et al, 2016).

559 As for fanning, earlier observations of this behaviour were made during egg-guarding, attributing  
560 it to parental care (Hancock, 1852), with ventilation of spawn being considered the main  
561 purpose under conditions of hypoxia and CO<sub>2</sub> build-up in the nest (Van Iersel, 1953; Sevenster,  
562 1961). Apparently widespread among Antarctic Notothenioids, egg-guarding does manifest  
563 uniparental fanning in some species (Daniels, 1979; Ferrando et al., 2014). In our experiments,  
564 however, fanning occurs in all specimens, male and female, in the absence of clutch, *i.e.*, under  
565 conditions that do not assume parental care. Based on the onset of fanning, nearly coincident  
566 with the maximum of  $f_v$  and greatly intensifying during subsequent hyperventilation plateaus, we  
567 hypothesize that it constitutes an alternative respiratory behaviour in coping with thermal stress  
568 and progressive aquatic hypoxia. Supporting this hypothesis, continuous pectoral fanning was  
569 reported in captive *Trematomus loennbergii* in the McMurdo station aquarium (Eastman, 1993),  
570 also without clutch. Although the significance of this behaviour remained uncertain in this earlier  
571 report, it is plausible that some degree of hypoxia could exist in aquaria, even at low ambient  
572 temperature (*e.g.*, due to overcrowding). Specific roles of fanning in respiration of Hb- and Hb+  
573 fishes, however, may differ. High frequency undulatory fanning in *C. aceratus* may facilitate  
574 cutaneous gas exchange, the role of which has long been discussed, particularly in the  
575 physiology of scaleless Hb- channichthyids (Hemmingsen, 1991; Eastman, 1993). Frequency of  
576 fanning in *N. coriiceps*, in contrast, is comparable with that of opercular beats, which may imply  
577 that in this species pectoral fin fanning may assist branchial pump.

578 Otherwise, all of these changes in respiratory behaviours of fishes observed in our experiments  
579 following the maximum of  $f_v$  between +8 and +8.5°C (*i.e.*, after achieving the limit of ventilation



580 effort) may be considered the manifestation of transition into “*pejus*” (from latin “worse”,  
581 Frederich and Pörtner, 2000) range. Albeit during this range they appear to mitigate, at least in  
582 part, the deleterious effects of progressive aquatic hypoxia and escalating metabolic load,  
583 respiratory collapse inevitably occurs in both species when all adjustments fail precipitously  
584 prior to LOE. It is not clear, however, if this collapse results from the limitations in cardiac  
585 function experienced by the fishes or is, conversely, their cause.

586 Regarding fin splays, the ethology of this newly described behaviour is not immediately  
587 apparent. We hypothesize that they may represent a possible contribution to cardiac output  
588 optimization during thermal stress, as they correspond to near maximal heart rates during  
589 thermal ramps (Joyce et al., 2018a). Specifically, the extension of appendages may move  
590 pectoral muscles and thus expand the pericardium which is, in fishes, attached to muscular  
591 elements of the pectoral girdle. In effect, the dimensions of pericardia of fishes are finite, thus  
592 imposing a limit on the maximal cardiac stroke volume. Indeed, a general observation is that  
593 fishes respond to warming by increasing their heart rate, whereas the stroke volume appears to  
594 be thermally insensitive (Eliason and Antilla, 2017). Some actively swimming fishes, including  
595 haemoglobinless *C. aceratus*, however, have demonstrated distinct increases in stroke volume  
596 in response to acute warming, particularly near the peaks of their heart rates (Gollock et al.,  
597 2006; Steinhausen et al., 2008, Mendonça and Gamperl, 2010; Joyce et al., 2018a).

598 Furthermore, surgical opening of the pericardium of a contracting *in situ* heart of  
599 haemoglobinless *Channichthys rhinoceratus*, resulted in a collapse of the ventricle (Feller et al.,  
600 1985), demonstrating the involvement of the intrapericardial pressure in the filling of the heart  
601 chambers in this species. On the other hand, in *N. coriiceps*, splays may work alongside  
602 respiratory-locomotor coupling during repetitive startle-like manoeuvres in Splay-Turn-Glide  
603 triplet FAP sequences, which persist in all Hb+ animals between ~12°C and ~15°C (over about

604 one hour of warming ramp). On the other hand, while the sequence of the three components  
605 does not change with increasing temperature, the frequency of triplet occurrence and the  
606 duration of individual components within triplets vary, which is consistent with the concept of  
607 relative variability of FAPs (Schleidt, 1974). These newly described manoeuvres appear to  
608 involve multiple muscle groups (trunk, opercula, fins and, plausibly, heart) and thus may  
609 constitute more complex coordinated cardiac and respiratory mitigation of detrimental effects of  
610 acute heat stress.

611 Altogether, combinations of relative quiescence, changes in ventilatory effort and efficacy,  
612 respiratory-locomotor coupling during startle-like manoeuvres, fanning, and fin splay can all be  
613 reasoned as metabolic, respiratory, cardiac, and haematologic (latter only in Hb+ fish)  
614 accommodations, resulting in simultaneous concerted optimization of multiple vital functions. In  
615 the face of continuous warming, however, the capacity of all these physiological adjustments is  
616 limited, and they only provide for short-term compensation in extreme conditions. Furthermore,  
617 with an apparent multitude of physiological functions involved, neither the cause of the ensuing  
618 organismal failure, nor the apparent differences in tolerance of an acute sublethal thermal stress  
619 between the species can be attributed to a single organ or system.

620 Thus, our findings demonstrate considerable capacity of both Hb+ and Hb- Antarctic fishes for  
621 thermoconformation within a limited thermal range. These short-term behavioural and  
622 physiological adjustments may be imperative for transient migrations of eurybathic (Eastman,  
623 2017) Notothenioids to favourable niches within a changing thermo- and oxycline for efficient  
624 habitat selection. Successful use of these new habitats under conditions of a lasting  
625 environmental change, however, should involve long-term behavioural and physiological  
626 adaptations, as well as ecological and evolutionary mechanisms (Huey et al, 2012; Pacifici et  
627 al., 2015). On the behavioural side, these adaptations may include adjustments of seasonal

628 timing of life-history events (including reproduction) and biotic inter-species interactions  
629 (including predator-prey relationships). On the physiological side, development of long-term  
630 adaptations depends on the maintenance of successful, but usually rare, adaptive genetic  
631 variations (Brennan et al., 2019), which is contingent on the large census and effective  
632 population sizes (Pespeni et al., 2013). The latter may be particularly problematic for  
633 Notothenioids, many of which remain depleted after severe industrial over-harvesting (Kock,  
634 1992) in the 1960-80s, with yet unclear prospects for population recovery (Belchier, 2013;  
635 Barrera-Oro et al., 2017). That is, without rational science-based management of fisheries in the  
636 Southern Ocean (Brooks et al., 2018), unregulated anthropogenic interventions have the  
637 potential to produce irreversible damage to this ecosystem, irrespective of how well species  
638 adapt to the detrimental effects of climate change.

639

#### 640 ***DATA AVAILABILITY***

641 The published article includes all datasets generated or analysed during this study. Original  
642 videos used for tracking analyses are available from the corresponding authors on request.

643

644 **ABBREVIATIONS**

645 BL·s<sup>-1</sup> - body lengths per second

646 DO<sub>2</sub> - dissolved oxygen

647 FAP - Fixed Action Pattern

648  $f_V$  - ventilation frequency

649 Hb- - haemoglobinless

650 Hb+ - haemoglobin expressing

651 LOE - loss of equilibrium

652 OA - opercula opening amplitude

653 OT - opercula opening time

654  $V_a$  - angular velocities

655

656 **ACKNOWLEDGEMENTS**

657 We are indebted for superb logistic support to the masters and crew of the Antarctic Research  
658 and Supply Vessel *Laurence M. Gould*, and to the winter support personnel of the United States  
659 Antarctic Program Palmer Station. Animal acquisition and maintenance during field work for this  
660 study represents a collaborative effort of ourselves and Dr. Elizabeth L. Crockett (Ohio  
661 University, USA), Dr. Kristin M. O'Brien (University of Alaska Fairbanks, USA), Dr. Stuart  
662 Egginton (University of Leeds, UK), Dr. Anthony P. Farrell (University of British Columbia,  
663 Canada), Dr. Theresa J. Grove (Valdosta State University, USA), Ms. Amanda M. Biederman  
664 (Ohio University, USA) and Ms. Elizabeth Evans (Ohio University, USA). Funding for the field

665 work was provided by the National Science Foundation grant ANT 1341602 to Dr. Elizabeth L.  
666 Crockett (Ohio University, USA). We also thank Drs. Crockett, O'Brien, Egginton and Farrell for  
667 inviting us to be part of this expedition and giving us the opportunity to carry out these studies.  
668 We are also indebted to Dr. Steve Zottoli for his critical suggestions on the manuscript. We also  
669 thank Dr. Chris Darby, the United Kingdom Chief Scientist to the Commission for the  
670 Conservation of Antarctic Marine Living Resources (CCAMLR), and Dr. Mark Belchier, the  
671 originator of the data, for permission to access and use the CCAMLR document WG-FSA 13/26.  
672 Funding for the field work was provided by the National Science Foundation grant ANT 1341602  
673 to Dr. Elizabeth L. Crockett (Ohio University, USA). Acquisition of equipment for behavioural  
674 experiments and all other activities throughout the study including the time and effort of Drs.  
675 Ismailov, Scharping and Friedlander were supported by the Fralin Biomedical Research Institute  
676 at VTC operational funds.

677

#### 678 ***COMPETING INTERESTS***

679 The authors declare no competing or financial interests.

680

#### 681 ***AUTHOR CONTRIBUTIONS***

682 Conceptualization - M.J.F.; Overall Methodology - M.J.F., I.I.I., J.B.S.; Equipment Custom  
683 Design - I.I.I., I.E.A., J.B.S.; Experiments at Palmer Station - I.I.I., J.B.S; Data analyses - I.I.I.,  
684 I.E.A., J.B.S; Writing of the MS: original draft - I.I.I., I.E.A.; review and editing - I.I.I., I.E.A.,  
685 J.B.S; M.J.F.

686

687 **REFERENCES**

- 688 Akanyeti, O., Thornycroft, P. J., Lauder, G.V., Yanagitsuru, Y.R., Peterson, A.N., & Liao, J.C.  
689 (2016). Fish optimize sensing and respiration during undulatory swimming. *Nature*  
690 *Communications*, 7, Article 11044. <https://doi.org/10.1038/ncomms11044>.
- 691 Allan, B.J., Domenici, P., Munday, P.L., & McCormick, M.I. (2015). Feeling the heat: the effect  
692 of acute temperature changes on predator-prey interactions in coral reef fish. *Conservation*  
693 *Physiology*, 3, Article cov011. <https://doi.org/10.1093/conphys/cov011>.
- 694 Archer, S.D., & Johnston, I.A. (1989). Kinematics of labriform and subcarangiform swimming in  
695 the Antarctic fish *Notothenia neglecta*. *Journal of Experimental Biology*, 143, 195-210.
- 696 Barker, P.F., & Thomas, E. (2004). Origin, signature and palaeoclimatic influence of the  
697 Antarctic Circumpolar Current. *Earth-Science Reviews*, 66, 143–162.  
698 <https://doi.org/10.1016/j.earscirev.2003.10.003>.
- 699 Barrera-Oro, E., Marschoff, E., & Ainley, D. (2017). Changing status of three notothenioid fish at  
700 the South Shetland Islands (1983–2016) after impacts of the 1970–80s commercial fishery.  
701 *Polar Biology*, 40, 2047–2054. <https://doi.org/10.1007/s00300-017-2125-0>.
- 702 Beers, J.M., & Sidell, B.D. (2011). Thermal tolerance of Antarctic notothenioid fishes correlates  
703 with level of circulating hemoglobin. *Physiological and Biochemical Zoology*, 84, 353-362.  
704 <https://doi.org/10.1086/660191>.
- 705 Belchier, M. (2013). *Decadal trends in the South Georgia demersal fish assemblage*.  
706 SCCAMLR-WG-FSA-13/26, CCAMLR, Australia, Hobart, 26 pp. [https://www.ccamlr.org/en/wg-](https://www.ccamlr.org/en/wg-fsa-13/26)  
707 [fsa-13/26](https://www.ccamlr.org/en/wg-fsa-13/26).

- 708 Bierman, H.S., Schriefer, J.E., Zottoli, S.J., & Hale, M.E. (2004). The effects of head and tail  
709 stimulation on the withdrawal startle response of the rope fish (*Erpetoichthys calabaricus*).  
710 *Journal of Experimental Biology*, 207, 3985-3997. <https://doi.org/10.1242/jeb.01228>.
- 711 Bisazza, A., Facchin, L., Pignatti, R., & Vallortigara, G. (1998). Lateralization of detour behavior  
712 in poeciliid fish: the effect of species, gender and sexual motivation. *Behavioural Brain*  
713 *Research*, 91, 157-164. [https://doi.org/10.1016/S0166-4328\(97\)00114-9](https://doi.org/10.1016/S0166-4328(97)00114-9).
- 714 Bisazza, A., Cantalupo, C., Capocchiano, M., & Vallortigara, G. (2000) Population lateralisation  
715 and social behaviour: a study with 16 species of fish. *Laterality* 5, 269-284.  
716 <https://doi.org/10.1080/713754381>.
- 717 Brennan, R.S., Garrett, A.D., Huber, K.E., Hargarten, H., & Pespeni M.H. (2019). Rare genetic  
718 variation and balanced polymorphisms are important for survival in global change conditions.  
719 *Proceedings of the Royal Society B: Biological Sciences*, 286, Article 20190943.  
720 <https://doi.org/10.1098/rspb.2019.0943>.
- 721 Brooks, C.M., Ainley, D.G., Abrams, P.A., Dayton, P.K., Hofman, R.J., Jacquet, J., & Siniff, D.B.  
722 (2018). Antarctic fisheries: factor climate change into their management. *Nature*, 558, 177-180.  
723 <https://doi.org/10.1038/d41586-018-05372-x>.
- 724 Bull, H.O. (1936). Studies on conditioned responses in fishes. Part VII. Temperature perception  
725 in teleosts. *Journal of the Marine Biological Association of the United Kingdom*, 21, 1-27.  
726 <https://doi.org/10.1017/S0025315400011176>.
- 727 Cheng, L., Abraham, J., Hausfather, Z., & Trenberth, K.E. (2019). How fast are the oceans  
728 warming? *Science*, 363, 128-129. <https://doi.org/10.1126/science.aav7619>.
- 729 Clarke, A., Barnes, D.K.A., Bracegirdle, T.J., Ducklow, H.W., King, J.C., Meredith, M.P.,  
730 Murphy, E.J., & Peck, L.S. (2012). The impact of regional climate change on the marine

- 731 ecosystem of the Western Antarctic Peninsula. In A.D. Rogers, N.M. Johnston, E.J. Murphy, &  
732 A. Clarke (Eds.) *Antarctic ecosystems: an extreme environment in a changing world* (pp.  
733 91–120). Oxford, UK, Wiley-Blackwell. <https://doi.org/10.1002/9781444347241.ch4>.
- 734 Cocca, E., Ratnayake-Lecamwasam, M., Parker, S.K., Camardella, L., Ciaramella, M., di Prisco,  
735 G. & Detrich, H.W., 3rd (1995). Genomic remnants of alpha-globin genes in the hemoglobinless  
736 Antarctic icefishes. *Proceedings of the National Academy of Sciences of the United States of*  
737 *America*, 92, 1817-1821. <https://doi.org/10.1073/pnas.92.6.1817>.
- 738 Constable, A.J., Melbourne-Thomas, J., Corney, S.P., Arrigo, K.R., Barbraud, C., Barnes, D.K.,  
739 Bindoff, N.L., Boyd, P.W., Brandt, A., Costa, D.P., et al. (2014). Climate change and Southern  
740 Ocean ecosystems I: How changes in physical habitats directly affect marine biota. *Global*  
741 *Change Biology*, 20, 3004-3025. <https://doi.org/10.1111/gcb.12623>.
- 742 Crawshaw, L.I. (1979). Responses to rapid temperature change in vertebrate ectotherms.  
743 *American Zoologist*, 19, 225-237. <https://doi.org/10.1093/icb/19.1.225>.
- 744 Daniels, R.A. (1979). Nest guard replacement in the Antarctic fish *Harpagifer bispinis*: possible  
745 altruistic behaviour. *Science*, 205, 831–833. <https://doi.org/10.1126/science.205.4408.831>.
- 746 Davison, W., Franklin, C.E., & Mckenzie, J.C. (1994). Hematological changes in an Antarctic  
747 teleost, *Trematomus bernacchii*, following stress. *Polar Biology*, 14, 463-466.  
748 <https://doi.org/10.1007/BF00239050>.
- 749 Domenici, P. (2010). Escape responses in fish: Kinematics, performance and behavior. In P.  
750 Domenici , & B.G. Kapoor, B.G. (Eds.), *Fish locomotion: An eco-ethological perspective*. (pp.  
751 123-170), Enfield, NH, USA, Science Publishers. <https://doi.org/10.1201/b10190-6>.



- 752 Domenici, P., & Hale, M.E. (2019). Escape responses of fish: a review of the diversity in motor  
753 control, kinematics and behaviour. *Journal of Experimental Biology* 222, Article jeb166009  
754 <https://doi.org/10.1242/jeb.166009>.
- 755 Domenici, P., Lefrançois, C., & Shingles, A. (2007). Hypoxia and the antipredator behaviours of  
756 fishes. *Philosophical Transactions of the Royal Society B: Biological Sciences*, 362, 2105-  
757 2121. <https://doi.org/10.1098/rstb.2007.2103>.
- 758 Eastman, J.T. (1993). *Antarctic fish biology: Evolution in a unique environment*. San Diego,  
759 USA, Academic Press.
- 760 Eastman, J.T. (2017). Bathymetric distributions of notothenioid fishes. *Polar Biology*, 40, 2077-  
761 2099. <https://doi.org/10.1007/s00300-017-2128-x>.
- 762 Eastman, J.T., & Lannoo, M.J. (2004). Brain and sense organ anatomy and histology in  
763 hemoglobinless Antarctic icefishes (Perciformes: Notothenioidei: Channichthyidae). *Journal of*  
764 *Morphology*, 260, 117–140. <https://doi.org/10.1002/jmor.10221>.
- 765 Eaton, R.C., Bombardieri, R.A., & Meyer, D. (1977). The Mauthner-initiated startle response in  
766 teleost fish. *Journal of Experimental Biology*, 66, 65–81.
- 767 Eaton, R.C., & Emberley, D.S. (1991). How stimulus direction determines the trajectory of the  
768 Mauthner-initiated escape response in a teleost fish. *Journal of Experimental Biology*, 161, 469-  
769 487.
- 770 Eaton, R.C., & Hackett, J.T. (1984). The role of Mauthner cell in fast-starts involving escape in  
771 teleost fish. In R.C. Eaton (Ed.), *Neural mechanisms of startle behaviour*. (pp. 213-266). Boston,  
772 MA, USA, Springer. [https://doi.org/10.1007/978-1-4899-2286-1\\_8](https://doi.org/10.1007/978-1-4899-2286-1_8).

- 773 Eaton, R.C., Lee, R.K., & Foreman, M.B. (2001). The Mauthner cell and other identified neurons  
774 of the brainstem escape network of fish. *Progress in Neurobiology*, 63, 467-485.  
775 [https://doi.org/10.1016/S0301-0082\(00\)00047-2](https://doi.org/10.1016/S0301-0082(00)00047-2).
- 776 Eliason, E.J., & Antilla, K. (2017). Temperature and the cardiovascular system. In A.K. Gamperl,  
777 T.E. Gillis, A.P. Farrell, & C.J. Brauner (Eds.), *Fish Physiology, Vol. 36B. The Cardiovascular*  
778 *System: Development, Plasticity and Physiological Responses*. (pp. 235-297). San Diego, USA  
779 Academic Press, <https://doi.org/10.1016/bs.fp.2017.09.003>.
- 780 Fanta, E., Luchiaro, P.H., & Bacila, M. (1989). The effect of temperature increase on the  
781 behavior of Antarctic fish. *Proceedings of the National Institute of Polar Research Symposium*  
782 *on Polar Biology*, 2, 123-130. <http://id.nii.ac.jp/1291/00005059/>.
- 783 Feller, G., Goessens, G., Gerday, C., & Bassleer, R. (1985). Heart structure and ventricular  
784 ultrastructure of hemoglobin- and myoglobin-free icefish *Channichthys rhinoceratus*. *Cell and*  
785 *Tissue Research*, 242, 669-676. <https://doi.org/10.1007/BF00225436>.
- 786 Ferrando, S., Castellano, L., Gallus, L., Ghigliotti, L., Masini, M.A., Pisano, E., & Vacchi, M.  
787 (2014). Demonstration of nesting in two Antarctic icefish (Genus *Chionodraco*) using a fin  
788 dimorphism analysis and *Ex Situ* videos. *PLoS ONE*, 9, Article e90512.  
789 <https://doi.org/10.1371/journal.pone.0090512>.
- 790 Franklin, C.E., & Johnston, I.A. (1997). Muscle power output during escape responses in an  
791 Antarctic fish. *Journal of Experimental Biology*, 200, 703–712.
- 792 Frederich, M., & Pörtner, H.-O. (2000). Oxygen limitation of thermal tolerance defined by cardiac  
793 and ventilatory performance in spider crab, *Maja squinado*. *American Journal of Physiology*,  
794 279, R1531–R1538. <https://doi.org/10.1152/ajpregu.2000.279.5.R1531>.

- 795 Friedlander, M.J., Kotchabhakdi, N., & Prosser, C.L. (1976). Effects of cold and heat on  
796 behavior and cerebellar function in goldfish. *Journal of Comparative Physiology A*, 112, 19-45.  
797 <https://doi.org/10.1007/BF00612674>.
- 798 Fry, F.E.J., & Hart, J.S. (1948). The relation of temperature to oxygen consumption in the  
799 goldfish. *The Biological Bulletin*, 94, 68-77. <https://doi.org/10.2307/1538211>.
- 800 Gollock, M.J., Currie, S., Petersen, L.H., & Gamperl, A.K. (2006). Cardiovascular and  
801 haematological responses of Atlantic cod (*Gadus morhua*) to acute temperature increase.  
802 *Journal of Experimental Biology*, 209, 2961-2970 <https://doi.org/10.1242/jeb.02319>.
- 803 Greenwood A.K., Peichel, C.L., & Zottoli, S.J. (2010). Distinct startle responses are associated  
804 with neuroanatomical differences in pufferfishes *Journal of Experimental Biology*, 213, 613-620.  
805 <https://doi.org/10.1242/jeb.037085>.
- 806 Grigaltchik, V.S., Ward, A.J.W., & Seebacher, F. (2012). Thermal acclimation of interactions:  
807 differential responses to temperature change alter predator-prey relationship. *Proceedings of*  
808 *the Royal Society B: Biological Sciences*, 279, 4058–4064.  
809 <https://doi.org/10.1098/rspb.2012.1277>.
- 810 Hemmingsen, E.A. (1991). Respiratory and cardiovascular adaptations in hemoglobin-free fish:  
811 resolved and unresolved problems. In G. Di Prisco, B. Maresca, & B. Tota (Eds.), *Biology of*  
812 *Antarctic Fish* (pp. 191-203). Berlin, Germany, Springer. [https://doi.org/10.1007/978-3-642-](https://doi.org/10.1007/978-3-642-76217-8_13)  
813 [76217-8\\_13](https://doi.org/10.1007/978-3-642-76217-8_13).
- 814 Hancock, A. (1852). Observations on the nidification of *Gasterosteus aculeatus* and  
815 *Gasterosteus spinachia*. *The Annals and Magazine of Natural History*, 10, 241-248.  
816 <https://doi.org/10.1080/03745485609495690>.

- 817 Holeton, G.F. (1970). Oxygen uptake and circulation by a hemoglobinless Antarctic fish  
818 (*Chaenocephalus aceratus*, Lonnberg) compared with three red-blooded Antarctic fish. *Comp.*  
819 *Biochem. Physiol.* 34, 457 -471. [https://doi.org/10.1016/0010-406X\(70\)90185-4](https://doi.org/10.1016/0010-406X(70)90185-4).
- 820 Huey, R.B., Kearney, M.R., Krockenberger, A., Holtum, J.A., Jess, M., & Williams, S.E. (2012).  
821 Predicting organismal vulnerability to climate warming: roles of behaviour, physiology and  
822 adaptation. *Philosophical Transactions of the Royal Society B: Biological Sciences*, 367, 1665-  
823 1679. <https://doi.org/10.1098/rstb.2012.0005>.
- 824 Hughes, G.M., & Roberts, J.L. (1970). A study of the effect of temperature changes on the  
825 respiratory pumps of the rainbow trout. *Journal of Experimental Biology*, 52, 177-192.
- 826 Heath, A.G., & Hughes, G.M. (1973). Cardiovascular and respiratory changes during heat stress  
827 in rainbow trout (*Salmo gairdneri*). *Journal of Experimental Biology*, 59, 323-338.
- 828 Hureau, J.C. (1985). *Channichthyidae*. In W. Fischer, & J.C. Hureau (Eds.), *FAO species*  
829 *identification sheets for fishery purposes. Southern Ocean (Fishing Areas 48, 58 and 88).*  
830 *(CCAMLR Convention Area)*. Vol. 2, (pp. 261–277). The Food and Agriculture Organization of  
831 the United Nations, Rome, Italy. <http://www.fao.org/3/ah842e/ah842e00.htm>.
- 832 Jayasundara, N., Healy, T.M., & Somero, G.N. (2013). Effects of temperature acclimation on  
833 cardiorespiratory performance of the Antarctic notothenioid *Trematomus bernacchii*. *Polar*  
834 *Biology*, 36, 1047–105. <https://doi.org/10.1007/s00300-013-1327-3>.
- 835 Joyce, W., Egginton, S., Farrell, A.P., Crockett, E.L., O'Brien, K.M., & Axelsson, M. (2018a).  
836 Exploring nature's natural knockouts: in vivo cardiorespiratory performance of Antarctic fishes  
837 during acute warming. *Journal of Experimental Biology*, 221, Article: jeb183160.  
838 <https://doi.org/10.1242/jeb.183160>.

- 839 Joyce, W., Axelsson, M., Egginton, S., Farrell, A.P., Crockett, E.L., & O'Brien, K.M. (2018b). The  
840 effects of thermal acclimation on cardio-respiratory performance in an Antarctic fish (*Notothenia*  
841 *coriiceps*). *Conservation Physiology*, 6, Article coy069, <https://doi.org/10.1093/conphys/coy069>.
- 842 Jutfelt, F., Norin, T., Ern, R., Overgaard, J., Wang, T., McKenzie, D.J., Lefevre, S., Nilsson,  
843 G.E., Metcalfe, N.B., Hickey, A., et al. (2018). Oxygen- and capacity-limited thermal tolerance:  
844 blurring ecology and physiology. *Journal of Experimental Biology*, 221, Article jeb169615.  
845 <https://doi.org/10.1242/jeb.169615>.
- 846 Kock, K. (1992) *Antarctic fish and fisheries*. Cambridge, UK, Cambridge University Press.
- 847 Liu, Y.C., & Hale, M.E. (2014). Alternative forms of axial startle behaviors in fishes. *Zoology*,  
848 117, 36-47. <https://doi.org/10.1016/j.zool.2013.10.008>.
- 849 Lucon-Xiccato, T., Nati, J.J., Blasco, F.R., Johansen, J.L., Steffensen, J.F., & Domenici, P.  
850 (2014). Severe hypoxia impairs lateralization in a marine teleost fish. *Journal of Experimental*  
851 *Biology*, 217, 4115–4118. <https://doi.org/10.1242/jeb.111229>.
- 852 Mendonça, P.C., & Gamperl, A.K. (2010). The effects of acute changes in temperature and  
853 oxygen availability on cardiac performance in winter flounder (*Pseudopleuronectes*  
854 *americanus*). *Comparative Biochemistry and Physiology Part A: Molecular & Integrative*  
855 *Physiology*, 155, 245-252 <https://doi.org/10.1016/j.cbpa.2009.11.006>.
- 856 Meyers, J.R., Copanas, E.H., & Zottoli, S.J. (1998) Comparison of fast startle responses  
857 between two elongate bony fish with an anguilliform type of locomotion and the implications for  
858 the underlying neuronal basis of escape behavior. *Brain, Behavior and Evolution*, 52, 7-22.  
859 <https://doi.org/10.1159/000006548>.

- 860 Nilsson, G.E., Rosén, P., & Johansson, D. (1993). Anoxic depression of spontaneous locomotor  
861 activity in crucian carp quantified by a computerized imaging technique. *Journal of Experimental*  
862 *Biology*, 180, 153-162.
- 863 O'Brien, K.M., Rix, A.S., Egginton, S., Farrell, A.P., Crockett, E.L., Schlauch, K., Woolsey, R.,  
864 Hoffman, M., & Merriman, S. (2018). Cardiac mitochondrial metabolism may contribute to  
865 differences in thermal tolerance of red- and white-blooded Antarctic notothenioid fishes. *Journal*  
866 *of Experimental Biology*, 221, Article jeb177816. <https://doi.org/10.1242/jeb.177816>.
- 867 Pacifici, M. Foden, W.B., Visconti, P., Watson, J.E.M., Butchart, S.H.M., Kovacs, K.M.,  
868 Scheffers, B.R., Hole, D.G., Martin, T.G., Akcakaya, H.R., et al. (2015). Assessing species  
869 vulnerability to climate change. *Nature Climate Change*, 5, 215–224.  
870 <https://doi.org/10.1038/nclimate2448>.
- 871 Pespeni, M.H., & Palumbi, S.R. (2013). Signals of selection in outlier loci in a widely dispersing  
872 species across an environmental mosaic. *Molecular Ecology*, 22, 3580–3597.  
873 <https://doi.org/10.1111/mec.12337>.
- 874 Pointer, M.A., Cheng, C.H., Bowmaker, J.K., Parry, J.W., Soto, N., Jeffery, G., Cowing, J.A., &  
875 Hunt, D.M. (2005). Adaptations to an extreme environment: retinal organisation and spectral  
876 properties of photoreceptors in Antarctic notothenioid fish. *Journal of Experimental Biology*, 208,  
877 2363–2376. <https://doi.org/10.1242/jeb.01647>.
- 878 Pörtner, H.O. (2001). Climate change and temperature dependent biogeography: oxygen  
879 limitation of thermal tolerance in animals. *Naturwissenschaften*, 88, 137–146.  
880 <https://doi.org/10.1007/s001140100216>.

- 881 Pörtner, H.-O., Bock, C., & Mark, F.C. (2017). Oxygen- and capacity-limited thermal tolerance:  
882 bridging ecology and physiology. *Journal of Experimental Biology*, 220, 2685-2696  
883 <https://doi.org/10.1242/jeb.134585>.
- 884 Roche, D.G., Amcoff, M., Morgan, R., Sundin, J., Andreassen, A.H., Finnøen, M.H., Lawrence,  
885 M.J., Henderson, E., Norin, T., Speers-Roesch, B., Brown, C., Clark, T.D., Bshary, R., Leung,  
886 B., Jutfelt, F., Binning, S.A. (2020) Behavioural lateralization in a detour test is not repeatable in  
887 fishes. *Animal Behaviour*, 167, 55-64. <https://doi.org/10.1016/j.anbehav.2020.06.025>
- 888 Rogers, L.J. (2010). Relevance of brain and behavioural lateralization to animal welfare. *Applied*  
889 *Animal Behaviour Science*, 127, 1–11. <https://doi.org/10.1016/j.applanim.2010.06.008>.
- 890 Ruud, J.T. (1954). Vertebrates without erythrocytes and blood pigment. *Nature*, 173, 848-850.  
891 <https://doi.org/10.1038/173848a0>.
- 892 Sánchez-García, M.A., Zottoli, S.J. & Roberson, L.M. (2019). Hypoxia has a lasting effect on  
893 fast-startle behavior of the tropical fish *Haemulon plumieri*. *The Biological Bulletin*, 237, 48-62  
894 <https://doi.org/10.1086/704337>.
- 895 Schleidt, W.M. (1974). How "fixed" is the fixed action pattern? *Zeitschrift für Tierpsychologie*, 36,  
896 184-211 <https://doi.org/10.1111/j.1439-0310.1974.tb02131.x>.
- 897 Schurmann, H., & Steffensen, J.F. (1994). Spontaneous swimming activity of Atlantic cod  
898 *Gadus morhua* exposed to graded hypoxia at three temperatures. *Journal of Experimental*  
899 *Biology*, 197, 129–142.
- 900 Sevenster, P. (1961). A causal analysis of a displacement activity (fanning in *Gasterosteus*  
901 *aculeatus*). *Behaviour*, (Suppl.), 9, 1-170. <https://www.jstor.org/stable/30039143>.
- 902 Shelford, V.E., & Powers, E.B. (1915). An experimental study of the movements of herring and  
903 other marine fishes. *The Biological Bulletin*, 28, 315-334. <https://doi.org/10.2307/1536432>.

- 904 Sillar, K.T., & Robertson, R.M. (2009). Thermal activation of escape swimming in post-hatching  
905 *Xenopus laevis* frog larvae. *Journal of Experimental Biology*, 212, 2356-2364.  
906 <https://doi.org/10.1242/jeb.029892>.
- 907 Somero, G.N., & DeVries, A.L. (1967). Temperature tolerance of some Antarctic fishes.  
908 *Science*, 156, 257–258. <https://doi.org/10.1126/science.156.3772.257>.
- 909 Steinhausen, M.F., Sandblom, E., Eliason, E.J., Verhille, C., & Farrell, A.P. (2008). The effect of  
910 acute temperature increases on the cardiorespiratory performance of resting and swimming  
911 sockeye salmon (*Oncorhynchus nerka*). *Journal of Experimental Biology*, 211, 3915-3926.  
912 <https://doi.org/10.1242/jeb.019281>.
- 913 Tinbergen, N. (1951). *The study of instinct*. Oxford, UK, Clarendon Press.
- 914 Thomas, C.D., Cameron, A., Green, R.E., Bakkenes, M., Beaumont, L.J., Collingham, Y.C.,  
915 Erasmus, B.F., De Siqueira, M.F., Grainger, A., Hannah, L., et al. (2004). Extinction risk from  
916 climate change. *Nature*, 427, 145–148. <https://doi.org/10.1038/nature02121>.
- 917 Turner, J., Lu, H., White, I., King, J. C., Phillips, T., Hosking, J.S., Bracegirdle, T.J., Marshall,  
918 G.J., Mulvaney, R., & Deb, P. (2016). Absence of 21st century warming on Antarctic Peninsula  
919 consistent with natural variability. *Nature*, 535, 411-415. <https://doi.org/10.1038/nature18645>.
- 920 Vallortigara, G., & Rogers, L.J. (2005). Survival with an asymmetrical brain: advantages and  
921 disadvantages of cerebral lateralization. *Behavioral and Brain Sciences*, 28, 575-589.  
922 <https://doi.org/10.1017/S0140525X05000105>.
- 923 Van Iersel, J.J.A. (1953). An analysis of the parental behaviour of the male three-spined  
924 stickleback (*Gasterosteus Aculeatus L.*). *Behaviour, (Suppl.)*, 3, 1-159.  
925 <http://www.jstor.org/stable/30039128>.



- 926 Vaughan, D.G., Marshall, G.J., Connolley, W.M., Parkinson, C., Mulvaney, R., Hodgson, D.A.,  
927 King, J.C., Pudsey, C.J., & Turner, J. (2003). Recent rapid regional climate warming on the  
928 Antarctic Peninsula. *Climatic Change*, 60, 243–274. <https://doi.org/10.1023/A:1026021217991>.
- 929 Ward, A.B., & Azizi, E. (2004) Convergent evolution of the head retraction escape response in  
930 elongate fishes and amphibians. *Zoology*, 107, 205-217.  
931 <https://doi.org/10.1016/j.zool.2004.04.003>.
- 932 Webb, P.W. (1976). The effect of size on the fast-start performance of rainbow trout *Salmo*  
933 *gairdneri*, and a consideration of piscivorous predator-prey interactions. *Journal of Experimental*  
934 *Biology*, 65, 157-177.
- 935 Webb, P.W. (1978). Fast-start performance and body form in seven species of teleost fish.  
936 *Journal of Experimental Biology*, 74, 211–226.
- 937 Wohlschlag, D.E. (1964). Respiratory metabolism and ecological characteristics of some fishes  
938 in McMurdo Sound, Antarctica. In M.O. Lee (Ed.), *Antarctic Research Series, Vol. 1. Biology of*  
939 *the Antarctic Seas* (pp. 33-62) American Geophysics Union.  
940 <https://doi.org/10.1029/AR001p0033>.
- 941 Zottoli, S.J., & Faber, D.S. (2000). The Mauthner cell: what has it taught us? *The Neuroscientist*,  
942 6, 25-37. <https://doi.org/10.1177/107385840000600111>.

943 **SUPPLEMENTAL FIGURES**

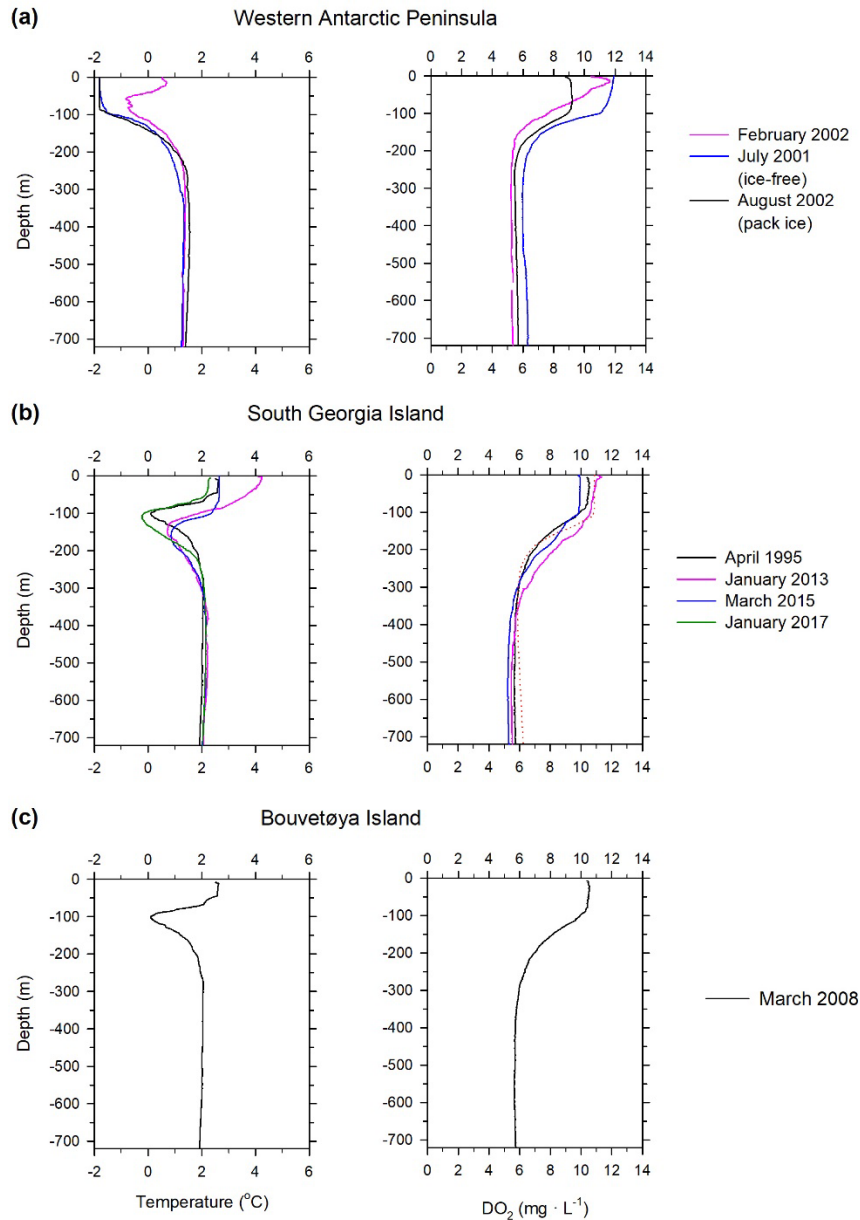

944

945 **FigureS1. Metadata analysis of vertical temperature and DO<sub>2</sub> profiles in areas of historic**  
946 **natural habitat of *N. coriiceps* and *C. aceratus*.**

947 (a) - Vicinity of the Western Antarctic Peninsula; Data sources: February, 2002 - Fritsen, C.

948 (2011) CTD data from the Cruise CD-ROMS on ARSV Laurence M. Gould (LMG0201A,

949 LMG0203, LMG0205, LMG0302, LMG0104) in the Southern Ocean from 2001-2003

950 (SOGLOBEC project). Biological and Chemical Oceanography Data Management Office (BCO-  
951 DMO). Dataset version 2011-04-07. Subset LMG0201 (Cast ## A1, A2, B2). [http://lod.bco-](http://lod.bco-dmo.org/id/dataset/2361)  
952 [dmo.org/id/dataset/2361](http://lod.bco-dmo.org/id/dataset/2361); accessed 3/14/2017; July, 2001 and August, 2002 - Klinck, J.M. and  
953 Hofmann, E.E. (2003) Processed standard depth (pressure) CTD data from SOGLOBEC survey  
954 cruises on RVIB Nathaniel B. Palmer - NBP0103; NBP0104; NBP0202; NBP0204 - in the  
955 Southern Ocean from 2001-2002 (SOGLOBEC project). Biological and Chemical Oceanography  
956 Data Management Office. Dataset version 2003-06-13. Subsets NBP0104 and NBP0204.  
957 <http://lod.bco-dmo.org/id/dataset/2360>; accessed 3/17/2017. Data on pack ice situation in  
958 August 2002 - U.S. Southern Ocean GLOBEC Report No. 8. Report of RVIB Nathaniel B.  
959 Palmer Cruise NBP02-04 to the Western Antarctic Peninsula, 31 July to 18 September 2002.  
960 [http://www.ccpo.odu.edu/Research/globec/main\\_cruises02/nbp0204/menu.html](http://www.ccpo.odu.edu/Research/globec/main_cruises02/nbp0204/menu.html)

961 (b) – Vicinity of the South Georgia Island; Data source - British Oceanographic Data Centre,  
962 Natural Environment Research Council, UK. April, 1995, January, 2013 and March, 2015 and  
963 January, 2017 curves represent averages of STD/CTD data collected during the RRS James  
964 Clark Ross cruise JR19950320 (JR10) within The UK World Ocean Circulation Experiment  
965 (WOCE) Project (BODC ID 1011019, 1011020, 1011032, 1011044 and 1011068); during RRS  
966 James Clark Ross cruise JR20130109 (JR274) within UK Ocean Acidification Research  
967 programme (BODC ID 1147675, 1147687, 1147699 and 1147706); during RRS James Clark  
968 Ross cruise JR20150309 (JR272D, JR310) within British Antarctic Survey Long Term  
969 Monitoring and Survey programme (BODC ID 1814444, 1814456, 1814468, 1814481 and  
970 1814493); and during RRS James Clark Ross cruise JR16004 within the Ocean Regulation of  
971 Climate by Heat and Carbon Sequestration and Transports (ORCHESTRA) project of the  
972 Natural Environment Research Council, UK (BODC ID 1836882, 1836894, 1836901 and  
973 1836925), respectively. January 2017 dataset does not have usable DO<sub>2</sub> data.

974 (c) – Vicinity of the Bouvetøya Island; Data source - British Oceanographic Data Centre, Natural  
975 Environment Research Council, UK. Curves represent averages of STD/CTD data collected  
976 during the Marion Dufresne cruise MD166 (BONUS-GOODHOPE, GIPY04) within the  
977 GEOTRACES project of the University of Western Brittany, France (BODC ID 1105470,  
978 1105494, 1105433).

979 Temperature of surface waters varies between locations during austral summer. Surface water  
980 DO<sub>2</sub> in the vicinity of the Western Antarctic Peninsula does not vary much between seasons, but  
981 depends on pack ice cover (compare July, 2001 and August, 2002 DO<sub>2</sub> profiles in **a**, right

982 panel). No STD/CTD data are available for austral winter in the vicinity of South Georgia and  
983 Bouvetøya islands. Preferred bathymetric ranges of *Nototheniidae* and *Channichthyidae* (<200  
984 metres for *N. coriiceps* and >100-200 metres for *C. aceratus*; Hureau, 1985), correspond to  
985 pronounced thermo- and oxycline in all locations.

986

987

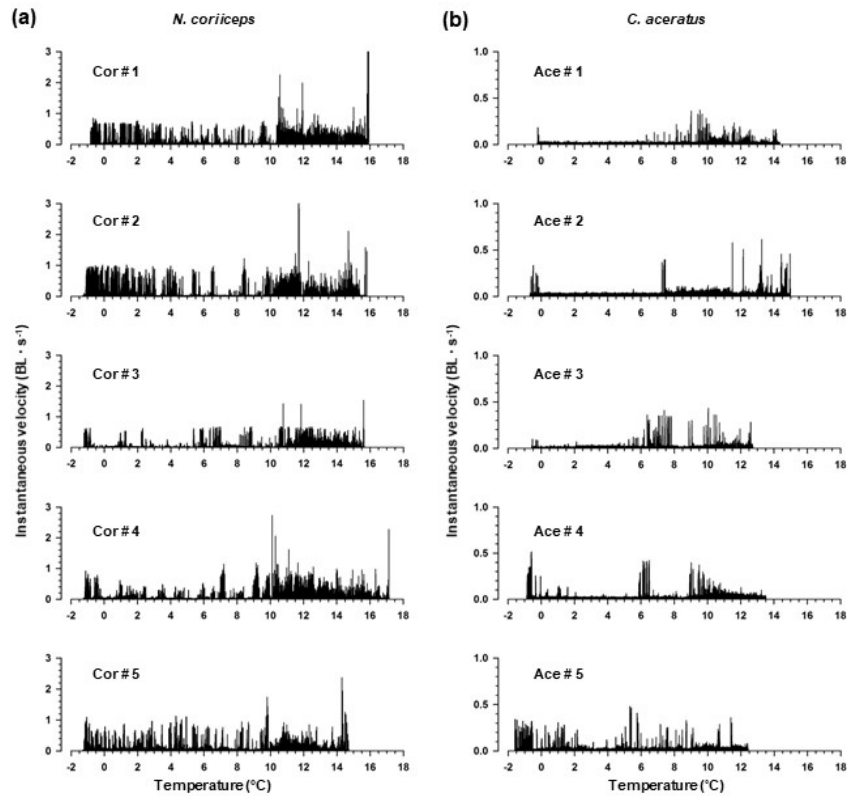

988

989 **Figure S2. Locomotor responses to warming in different specimens of *N. coriiceps* and**  
990 ***C. aceratus***

991 Traces are temperature plots of instantaneous (30 Hz sampling rate) velocity in individual  
992 experiments with (a) five specimens of *N. coriiceps* and (b) five specimens of *C. aceratus*  
993 calculated from absolute displacement of the centre of the mass of the fish in each consecutive  
994 sampling interval (video frame), normalized for body length (BL) of the specimen. Overall, *N.*  
995 *coriiceps* are more motile than *C. aceratus* (note a difference in scales of ordinates). Note that  
996 initial temperatures vary between experiments due to changing weather conditions in the Arthur  
997 Harbour. However, all animals of both species exhibit presumed avoidance behaviours within  
998 initial rise in temperature of as little as 0.1°C, followed by quiescence and reduced motility  
999 (sluggishness in *N. coriiceps* and motionless in *C. aceratus*). Onset and amount of intense  
1000 locomotion and startle-like behaviours vary between individual animals within the species.

1001 During these manoeuvres, *N. coriiceps* achieve instantaneous velocities up to  $2.5 \text{ BL}\cdot\text{s}^{-1}$ . When  
1002 approaching loss of equilibrium, all animals of both species reduce motility, but perform multiple  
1003 startle-like manoeuvres. Prior to the onset of LOE, all *N. coriiceps* and some specimens of *C.*  
1004 *aceratus* exhibit fast erratic swimming.

1005

1006

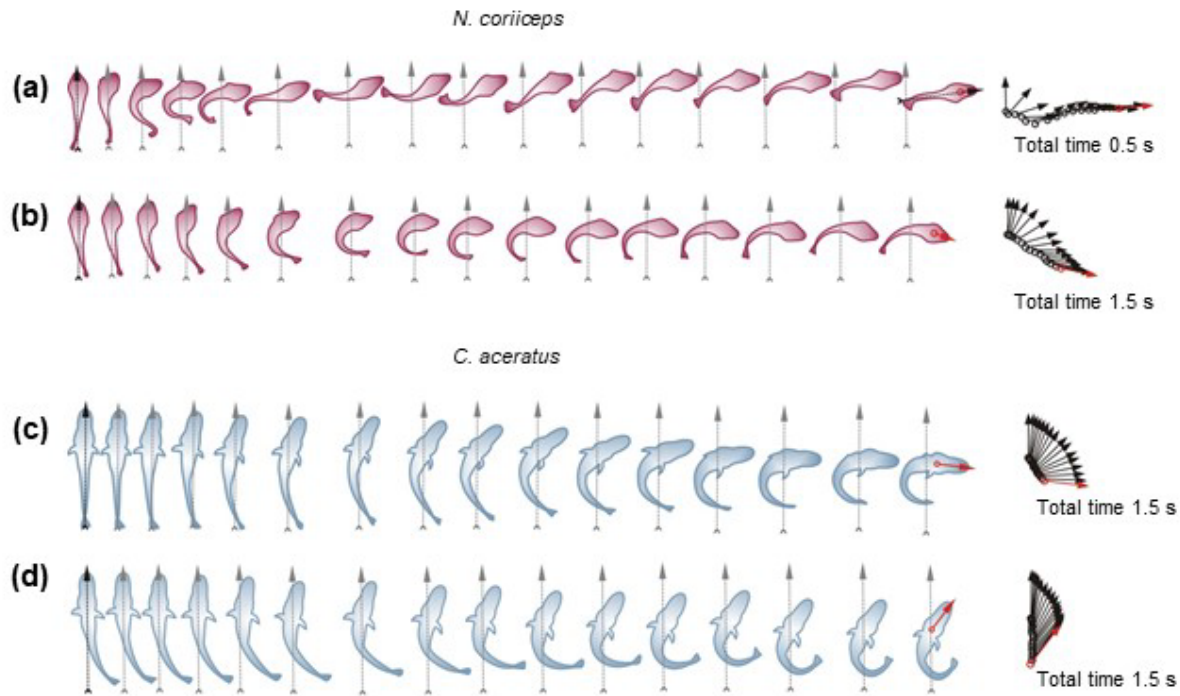

1007

1008 **Figure S3. Axial movements during temperature induced startle-like responses in *N.***  
1009 ***coriiceps* and *C. aceratus* in ventral view (pectoral fins not shown)**

1010 (a) *N. coriiceps* during an S-bend manoeuvre shown at 33 ms intervals (at +11.05°C)

1011 (b) *N. coriiceps* during a C-bend turn shown at 100 ms intervals (at +12.4°C)

1012 (c) *C. aceratus* during a C-bend turn shown at 100 ms intervals (at +8.5°C)

1013 (d) *C. aceratus* during a withdrawal (head retrieval) shown at 100 ms intervals (at +11.5°C)

1014 The grey vertical arrows indicate the position of the midline at the beginning of turning

1015 manoeuvres. Arrow diagrams on the right depict of the head orientation during turns, at time

1016 intervals indicated above. Each arrow connects the position of the fish nose with the centre of

1017 mass. Red arrows indicate final direction of locomotion. Note that C-bend turns of *N. coriiceps*

1018 are almost twice faster than those of *C. aceratus* (cf. (b) and (c)).

1019

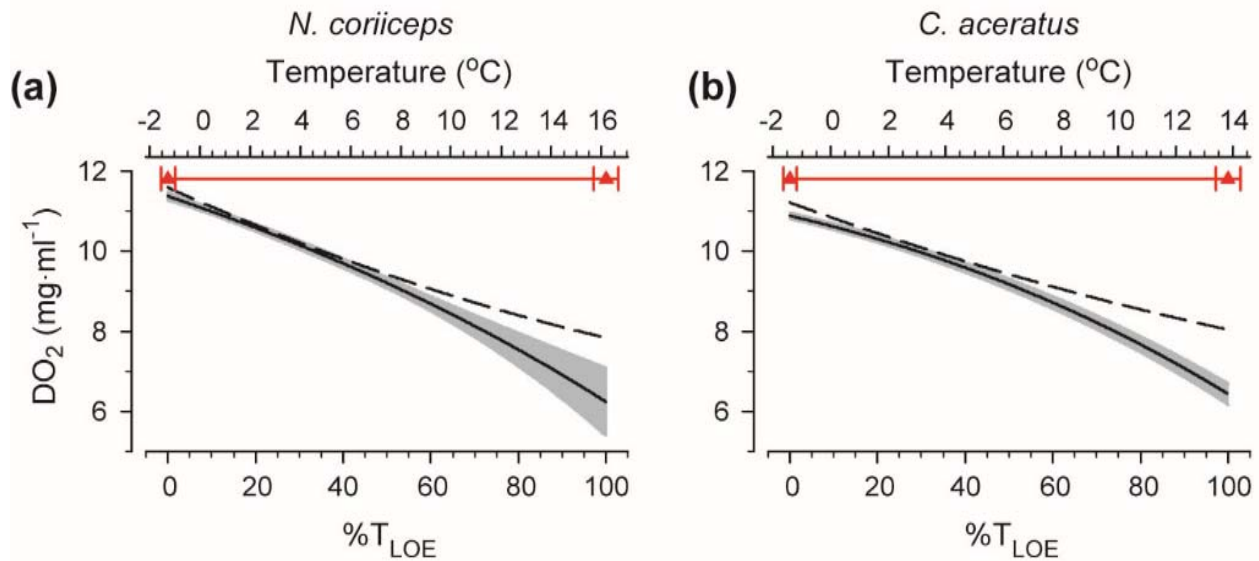

1020

1021 **Figure S4. Progressive aquatic hypoxia concomitant with warming of water in the**  
1022 **experimental tank.**

1023 Solid black lines and grey error bars in the graphs represent means and SEM of absolute DO<sub>2</sub>  
1024 measured simultaneously with temperature ramps, averaged between five experiments of each  
1025 species. Dashed lines represent theoretical temperature plots of DO<sub>2</sub> calculated using Henry's  
1026 law, corrected for salinity. For conventions of analyses and presentation of grouped data as a  
1027 function of temperature, see legend for Fig. 2 and Materials and Methods. Briefly, to account for  
1028 the differences in initial temperatures and in LOE onset temperatures between experiments, for  
1029 analyses and presentation of grouped data for various behaviours as a function of temperature,  
1030 data obtained in individual experiments within the species were aligned against each other and  
1031 against normalized range of the ramp (% T<sub>LOE</sub>, bottom axis), with 0 and 100% representing  
1032 initial ambient temperature and temperature at LOE in each respective experiment. Absolute  
1033 ranges of temperature ramps in °C (top axis) are depicted as red plots, with red triangle symbols  
1034 and horizontal error bars representing mean and SEM of temperatures at the start of the ramp  
1035 and at LOE averaged between five experiments with each species.

1036 Whether deviation of empirical DO<sub>2</sub> temperature plots from theoretical represents metabolic O<sub>2</sub>  
1037 consumption by the fishes, or from nonlinearities of our measurements is open to conjecture  
1038 since 1) manufacturer of the instrument does not imply calibration of the probe at temperatures



1039 below 0°C; 2) in the absence of conductivity measurements made during our experiments, we  
1040 used theoretical correction for salinity.

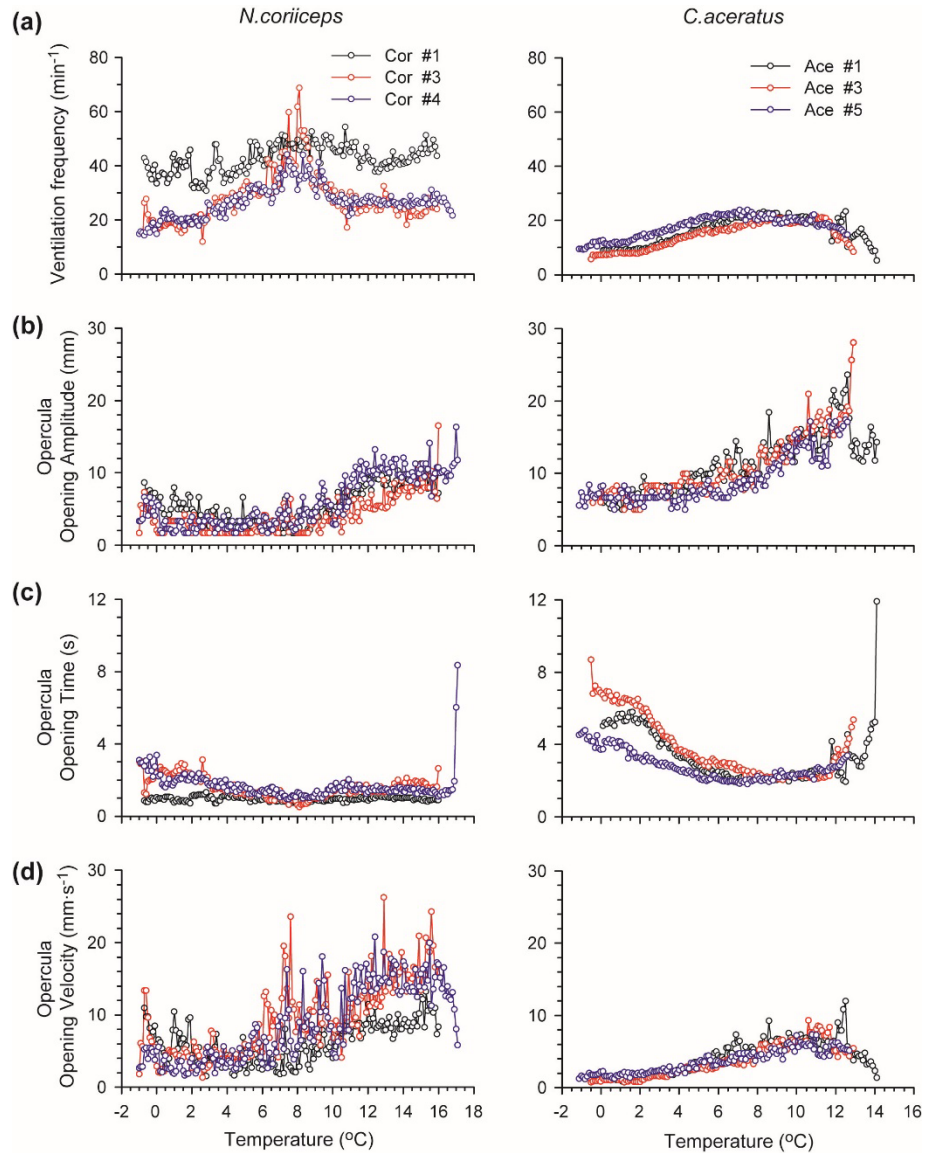

1041

1042 **FigureS5. Ventilatory responses to warming in different specimens of *N. coriiceps* and *C.***  
1043 ***aceratus*.**

1044 In response to warming, all fishes transiently increase ventilation rates ( $f_v$ ), amplitudes of  
1045 opercula opening (OA), but decrease opening time of opercula (OT). Data points represent  
1046 respective metrics in three specimens of each species (## in legends correspond to individual  
1047 experiments shown in Fig. S1). Note high  $f_v$  in Cor # 1 (black trace in top left panel) throughout  
1048 entire experiment, likely due to overall higher locomotor activity, possibly masking the effects of  
1049 temperature.

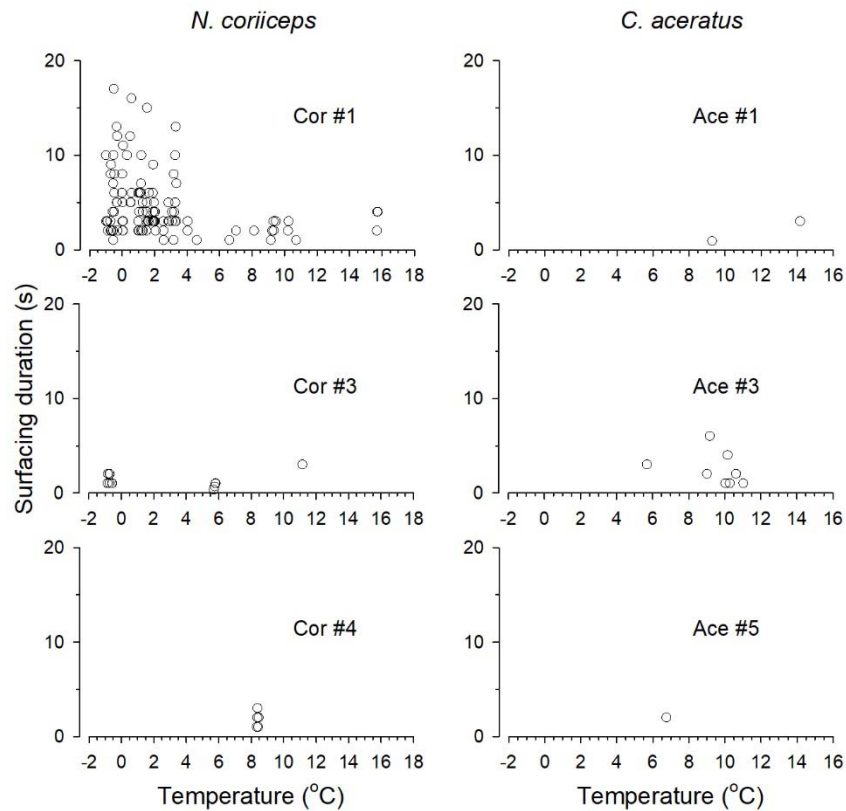

1050

1051 **Figure S6. Aquatic surface respiration of *N. coriiceps* and *C. aceratus* as a function of**  
1052 **temperature.**

1053 Data points represent time spent by three specimens of each species at water-air interface in a  
1054 form of continuous uninterrupted surfacing bouts, labelled corresponding to legends for Figs. S1  
1055 and S4. Occurrence of surfacing bouts in *N. coriiceps* is highly variable between the specimens,  
1056 ranging from <10 to >100 in number, from <0°C to >+6°C in the onset temperatures, and from 1  
1057 to 17 seconds in duration. Occurrence of surfacing in *C. aceratus* is less variable, ranging from  
1058 one to 8 in number, with all but two events occurring at the temperatures between +8°C and  
1059 +12°C, and all lasting from 1 to 7 seconds in duration. Surfacing of *C. aceratus* and short (< 7  
1060 seconds in duration) surfacing of *N. coriiceps* seen at the temperatures between +6°C and  
1061 +12°C may represent aquatic surface respiration behaviour, triggered by progressive aquatic  
1062 hypoxia, inherent to diminished solubility of gases in water at elevated temperatures. Ethological  
1063 understanding of numerous relatively long (lasting up to 17 seconds) surfacing elicited in some  
1064 (but not all) Hb+ fishes at low to moderate levels of hypoxia is not immediately apparent. We

1065 hypothesize that they may reflect the stress elicited by warming in fish deprived from a choice of  
1066 habitat/temperature in the tank.

1067 **LIST OF SUPPLEMENTAL MOVIES**

1068 Ismailov et al\_Supplemental Movie 01 - *C. aceratus* fanning at +10.5°C – ventral view

1069 <https://drive.google.com/file/d/1EJxThzRoSFLgZlesDaAdu47k4BL6uPLK/view?usp=sharing>

1070 Ismailov et al\_Supplemental Movie 02 - *C. aceratus* fanning at +10.5°C – side view

1071 [https://drive.google.com/file/d/1-PoIQMMfG\\_qf0srpxVI7IMepgVQG1e8X/view?usp=sharing](https://drive.google.com/file/d/1-PoIQMMfG_qf0srpxVI7IMepgVQG1e8X/view?usp=sharing)

1072 Ismailov et al\_Supplemental Movie 03 - *N. coriiceps* fanning at +11.2°C

1073 [https://drive.google.com/file/d/1R\\_bQb19adHFC4cQpRWLNn2ON\\_50cBhY/view?usp=sharing](https://drive.google.com/file/d/1R_bQb19adHFC4cQpRWLNn2ON_50cBhY/view?usp=sharing)

1074 Ismailov et al\_Supplemental Movie 04 - *N. coriiceps* splays and FAPs at +14.7°C

1075 [https://drive.google.com/file/d/1J4U-qU2f2QJnIHH4vnC\\_6fLkILjWBJDI/view?usp=sharing](https://drive.google.com/file/d/1J4U-qU2f2QJnIHH4vnC_6fLkILjWBJDI/view?usp=sharing)
